# Supplementary material for: Color tuning of multi-resonant thermally activated delayed fluorescence emitters based on fully fused polycyclic amine/carbonyl frameworks
Source: Royal Society of Chemistry journal article supplement (doi:10.1039/d3tc00641g), 2023-01-01
Supplement: d3tc00641g1.pdf [file d3tc00641g1.pdf]

**Color Tuning of Multi-Resonant Thermally Activated Delayed Fluorescence  
Emitters Based on Fully Fused Polycyclic Amine/Carbonyl Frameworks**

*John Marques dos Santos,<sup>a</sup> Chin-Yiu Chan,<sup>c</sup> Shi Tang,<sup>d</sup> David Hall,<sup>a,b</sup> Tomas Matulaitis,<sup>a</sup>  
David B. Cordes,<sup>a</sup> Alexandra M. Z. Slawin,<sup>a</sup> Youichi Tsuchiya,<sup>c</sup> Ludvig Edman,<sup>d\*</sup> Chihaya  
Adachi,<sup>c\*</sup> Yoann Olivier,<sup>b\*</sup> and Eli Zysman-Colman<sup>a\*</sup>*

<sup>a</sup> Organic Semiconductor Centre, EaStCHEM School of Chemistry, University of St Andrews,  
St Andrews, KY16 9ST, UK. E-mail: eli.zysman-colman@st-andrews.ac.uk;

<sup>b</sup> Laboratory for Computational Modeling of Functional Materials, Namur Institute of  
Structured Matter, University of Namur, Rue de Bruxelles, 61, 5000 Namur, Belgium. E-  
mail: yoann.olivier@unamur.be

<sup>c</sup> Center for Organic Photonics and Electronics Research (OPERA), Kyushu University,  
Motooka 744, Nishi-ku, Fukuoka 819-0395, Japan.

<sup>d</sup> The Organic Photonics and Electronics Group, Department of Physics, Umeå University,  
SE-90187 Umeå, Sweden

**Electronic Supporting Information**

**Table of content**

|                                                          |           |
|----------------------------------------------------------|-----------|
| <b>1. Experimental Section</b>                           | <b>4</b>  |
| <b>2. Synthetic procedures and characterization data</b> | <b>6</b>  |
| <b>3. X-Ray Crystallography</b>                          | <b>14</b> |
| <b>4. Photophysical data</b>                             | <b>16</b> |
| <b>5. Quantum chemical calculations</b>                  | <b>21</b> |
| <b>6. OLED characterization</b>                          | <b>24</b> |
| <b>7. LEC fabrication and characterization</b>           | <b>25</b> |

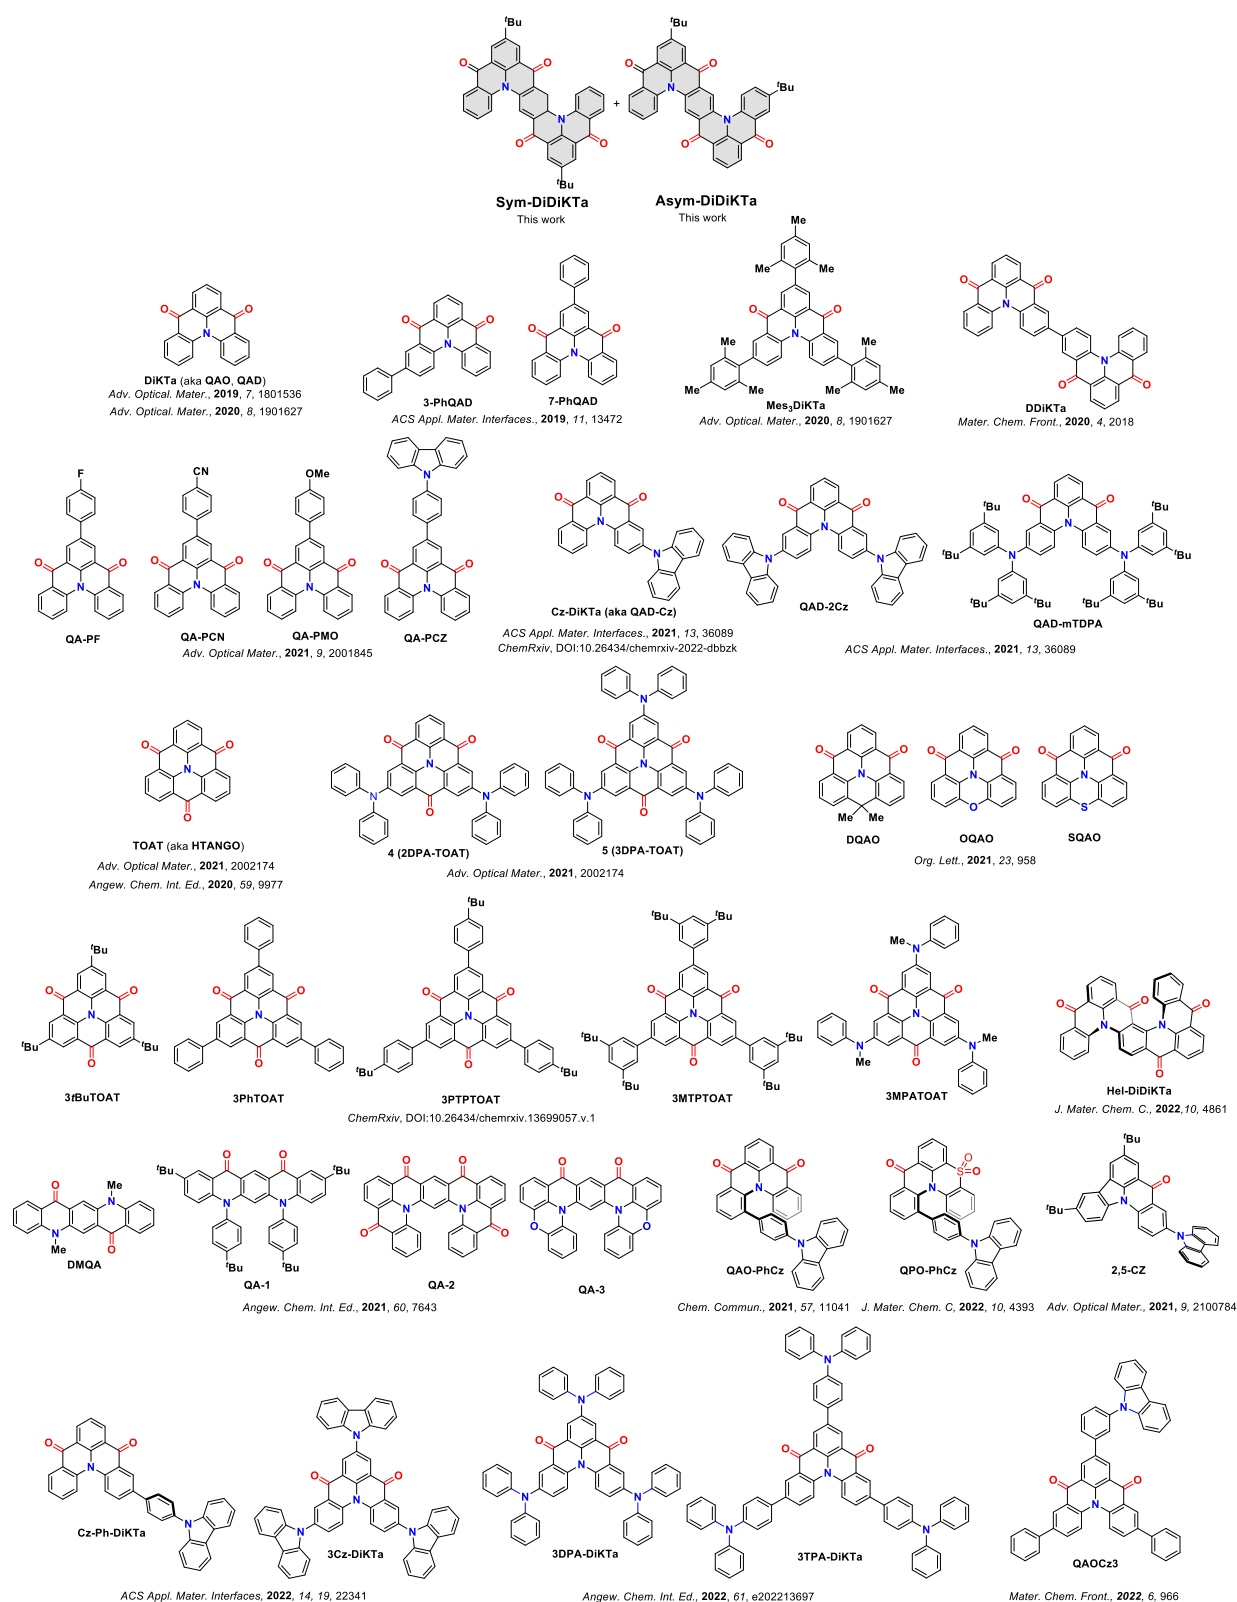

**Figure S1.** Chemical structures of prior examples of N/Carbonyl MR-TADF emitters.<sup>1–15</sup>

**Table S1.** Photophysical properties of N-Carbonyl MR-TADF emitters.

| Compound               | Medium           | $\lambda_{\text{PL}}$ / nm | $\Phi_{\text{PL}}$ / % | $\tau_{\text{D}}$ / $\mu\text{s}$ | $\Delta E_{\text{ST}}$ / eV | Ref       |
|------------------------|------------------|----------------------------|------------------------|-----------------------------------|-----------------------------|-----------|
| Sym-DiDiKTa            | 1% in mCP        | 542                        | 64                     | 1700                              | 0.24 <sup>a</sup>           | This work |
| Asym-DiDiKTa           | 1% in mCP        | 547                        | 57                     | 2100                              | 0.23 <sup>a</sup>           | This work |
| DiKTa/QAO/QAD          | 5 wt% mCP        | 466                        | 72                     | 93.3                              | 0.19                        | 1-2       |
| 3-PhQAD                | 2 wt% mCP        | 478                        | 73                     | 250                               | 0.18                        | 3         |
| 7Ph-QAD                | 2 wt% mCP        | 472                        | 68                     | 474                               | 0.19                        | 4         |
| Mes <sub>3</sub> DiKTa | 3.5 wt% mCP      | 477                        | 80                     | 20                                | 0.21                        | 2         |
| DDiKTa                 | 9 wt% DPEPO      | 490                        | 72                     | 1.2                               | 0.16                        | 4         |
| QA-PF                  | 3 wt% mCP        | 478                        | 89                     | 346.9                             | 0.24                        | 5         |
| QA-PCN                 | 3 wt% mCP        | 477                        | 68                     | 223.9                             | 0.18                        | 5         |
| QA-PMO                 | 3 wt% mCP        | 485                        | 66                     | 484.1                             | 0.25                        | 5         |
| QA-PCZ                 | 3 wt% mCP        | 480                        | 71                     | 339.1                             | 0.21                        | 5         |
| Cz-DiKTa/QAD-Cz        | 1 wt% mCP        | 500                        | 100                    | 205                               | 0.17                        | 6         |
| QAD-2Cz                | 12 wt% mCP       | 526                        | 100                    | 130                               | 0.17                        | 6         |
| QAD-mTDPA              | 1.5 wt% CBP      | 587                        | 97                     | 269                               | 0.33                        | 6         |
| DQAO                   | 8 wt% mCP        | 472                        | 59                     | 111                               | 0.19                        | 7         |
| OQAO                   | 5 wt% CBP        | 534                        | 90                     | 205                               | 0.16                        | 7         |
| SQAO                   | 1 wt% mCPCN      | 560                        | 65                     | 78                                | 0.16                        | 7         |
| TCTANGO                | Chloroform       | 445                        | 5                      | N/A                               | N/A                         | 8         |
| TBTANGO                | Neat film        | ~554                       | N/A                    | N/A                               | N/A                         | 8         |
| TITANGO                | Neat film        | ~561                       | N/A                    | N/A                               | N/A                         | 8         |
| <i>t</i> BuTANGO       | Chloroform       | 440                        | 13                     | N/A                               | N/A                         | 8         |
| TOAT/HTANGO            | Chloroform       | 422                        | 1                      | N/A                               | 0.34                        | 8-9       |
| 2DPA-TOAT              | 3 wt% mCBP       | ~598                       | 46                     | 3844                              | 0.34                        | 9         |
| 3DPA-TOAT              | 3 wt% mCBP       | ~590                       | 46                     | 2142                              | 0.34                        | 9         |
| 3 <i>t</i> BuTOAT      | 15 wt% SiCz      | 484                        | N/A                    | N/A                               | 0.29                        | 10        |
| 3PhTOAT                | 15 wt% mCP       | 516                        | 97                     | N/A                               | 0.12                        | 10        |
| 3PTPTOAT               | 15 wt% mCP       | 520                        | 93                     | N/A                               | 0.16                        | 10        |
| 3MTPTOAT               | 15 wt% mCP       | 502                        | 92                     | N/A                               | 0.14                        | 10        |
| 3MPATOAT               | 15 wt% CBP       | 654                        | N/A                    | N/A                               | 0.28                        | 10        |
| DMQA                   | Toluene          | ~520                       | 78                     | N/A                               | N/A                         | 11        |
| QA-1                   | 3 wt% PPCz       | 457                        | 94                     | 655                               | 0.29                        | 11        |
| QA-2                   | 3 wt% PPCz       | 465                        | 97                     | 48                                | 0.19                        | 11        |
| QA-3                   | 3 wt% PPCz       | 523                        | 99                     | 307                               | 0.19                        | 11        |
| Hel-DiDiKTa            | 1 wt% mCP        | 477                        | 4.1                    | 5.43                              | 0.13                        | 12        |
| QAO-PhCz               | 5% wt% in mCP    | 461 <sup>a</sup>           | 46                     | 40.36                             | 0.11 <sup>a</sup>           | 13        |
| QPO                    | 18% wt% in mCP   | 431 <sup>a</sup>           | 18                     | 468                               | 0.23                        | 14        |
| QPO-PhCz               | 18% wt% in DPEPO | 446 <sup>a</sup>           | 51                     | 536                               | 0.23                        | 14        |
| Cz-Ph-DiKTa            | 2 wt% mCP        | 486                        | 77                     | 155                               | 0.10                        | 15        |
| 3Cz-DiKTa              | 2 wt% mCP        | 539                        | 78                     | 287                               | 0.16                        | 15        |
| 3DPA-DiKTa             | 2 wt% mCP        | 617                        | 60                     | 323                               | 0.20                        | 16        |
| 3TPA-DiKTa             | 2 wt% mCP        | 551                        | 93                     | 131                               | 0.13                        | 16        |
| 2,5-Cz                 | 3.5 wt% mCBP     | 459 <sup>a</sup>           | 81                     | 619                               | 0.29 <sup>a</sup>           | 17        |
| QAOCz3                 | 5 wt% CBP        | 495                        | 99                     | 26.5                              | 0.16 <sup>a</sup>           | 18        |

The medium is specified in the second column, unless specified with a superscript as shown below:

<sup>a)</sup> toluene

~ Indicates that the data was obtained using a graphical fitting software.

## 1. Experimental Section

*General Synthetic Procedures.* All reagents and solvents were obtained from commercial sources and used as received. Air-sensitive reactions were performed under a nitrogen atmosphere using Schlenk techniques, no special precautions were taken to exclude air or moisture during work-up. DCM was obtained from a MBraun SPS5 solvent purification system. Flash column chromatography was carried out using silica gel (Silia-P from Silicycle, 60 Å, 40-63 µm). Analytical thin-layer-chromatography (TLC) was performed with silica plates with aluminum backings (250 µm with F-254 indicator). TLC visualization was accomplished by 254/365 nm UV lamp. HPLC analysis was conducted on a Shimadzu LC-40 HPLC equipped with a GPC using a Shim-pack GPC-803 column with THF as mobile phase. GCMS analysis was conducted using a Shimadzu QP2010SE GC-MS equipped with a Shimadzu SH-Rtx-1 column (30 m × 0.25 mm). <sup>1</sup>H and <sup>13</sup>C NMR spectra were recorded on a Bruker Advance spectrometer (400 MHz for <sup>1</sup>H and either 101 or 126 MHz for <sup>13</sup>C). The following abbreviations have been used for multiplicity assignments: “s” for singlet, “d” for doublet, “t” for triplet, “m” for multiplet, and “dd” for doublet of doublets. <sup>1</sup>H and <sup>13</sup>C NMR spectra were referenced residual solvent peaks with respect to TMS (δ = 0 ppm). Melting points were measured using open-ended capillaries on an Electrothermal 1101D Mel-Temp apparatus and are uncorrected. High-resolution mass spectrometry (HRMS) was performed in the Mass Spectrometry facility at the University of St Andrews.

*Electrochemistry Measurements.* Cyclic Voltammetry (CV) analysis was performed on an Electrochemical Analyzer potentiostat model 620E from CH Instruments at a sweep rate of 100 mV/s. Differential pulse voltammetry (DPV) was conducted with an increment potential of 0.01 V and a pulse amplitude, width, and period of 50 mV, 0.06, and 0.5 s, respectively. Samples were prepared as dichloromethane solutions, degassed by sparging with dichloromethane N<sub>2</sub> for 5 minutes before measurements. All measurements were performed using 0.1 M dichloromethane solution of tetra-n-butylammonium hexafluorophosphate ([nBu<sub>4</sub>N][PF<sub>6</sub>]). An Ag/Ag<sup>+</sup> electrode was used as the reference electrode, while a glassy carbon electrode and a platinum wire were used as the working electrode and counter electrode, respectively. The redox potentials are reported relative to a saturated calomel electrode (SCE) with a ferrocenium/ferrocene (Fc/Fc<sup>+</sup>) redox couple as the internal standard (0.46 V vs. SCE).<sup>19</sup>

The HOMO and LUMO energies were determined using the relation  $E_{\text{HOMO/LUMO}} = -(E_{\text{ox}} / E_{\text{red}} + 4.8)$  eV, where  $E_{\text{ox}}$  and  $E_{\text{red}}$  are the onset of anodic and cathodic peak potentials, respectively calculated from DPV relative to  $\text{Fc}/\text{Fc}^+$ .<sup>20</sup>

*Photophysical measurements.* Optically dilute solutions of concentrations on the order of  $10^{-5}$  or  $10^{-6}$  M were prepared in spectroscopic or HPLC grade solvents for absorption and emission analysis. Absorption spectra were recorded at room temperature on a Shimadzu UV-2600 double beam spectrophotometer with a 1 cm quartz cuvette. Molar absorptivity determination was verified by linear regression analysis of values obtained from at least four independent solutions at varying concentrations with absorbance ranging from  $1.0 \times 10^{-7}$  to  $1 \times 10^{-4}$  M. Steady-state and time-resolved emission spectra were recorded at 298 K using an Edinburgh Instruments FS5 and FLS980 spectrofluorometers. Samples were excited at 350 nm for steady-state measurements and at 378 nm for time-resolved measurements. For  $\Delta E_{\text{ST}}$  measurements an open Dewar was used for solution samples. All samples were photoexcited using the third harmonic emission (343 nm) from a femtosecond Nd:YAG laser, which originally emits at 1030 nm (Orpheus-N, model: PN13F1). Emission from the samples was focused onto a spectrograph (Chromex imaging, 250is spectrograph) and detected on a sensitive gated iCCD camera (Stanford Computer Optics, 4Picos) having subnanosecond resolution. Phosphorescence spectra were measured 1 ms after the excitation of the Nd:YAG laser with iCCD exposure time of 8.5 ms. Prompt fluorescence spectra were measured 1 ns after the excitation of the femtosecond laser with iCCD exposure time of 100 ns. An integrating sphere (SC-30 module on FS5 fluorimeter) was employed for the photoluminescence quantum yield measurements of solid samples. The  $\Phi_{\text{PL}}$  of the films were then measured for some cases in air and in all cases in  $\text{N}_2$  environment by purging the integrating sphere with  $\text{N}_2$  gas flow. The singlet-triplet energy splitting ( $\Delta E_{\text{ST}}$ ) in toluene was estimated from the onset of prompt fluorescence spectra and phosphorescence emission at 77 K. The samples were excited by a femtosecond laser emitting at 343 nm (Orpheus-N, model: SP-06-200-PP). Emission from the samples was focused onto a spectrograph (Chromex imaging, 250is spectrograph) and detected on a sensitive gated iCCD camera (Stanford Computer Optics, 4Picos) having subnanosecond resolution. Phosphorescence spectra of toluene glass were measured from 1 ms after photoexcitation, with an iCCD exposure time was 8.5 ms. Prompt fluorescence spectra were measured from 1 ns after photoexcitation with an iCCD exposure time was 100 ns.

## 2. Synthetic procedures and characterization data

### Dimethyl 2,5-bis((4-(tert-butyl)phenyl)amino)terephthalate (1):

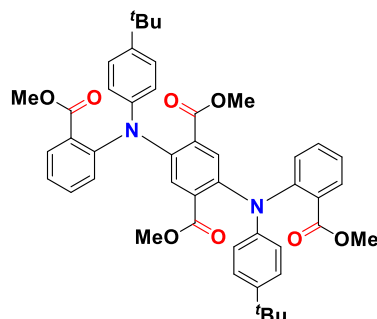

A 2-neck flask held under nitrogen was charged with 2,5-bis((4-(tert-butyl)phenyl)amino)terephthalate (4.00 g, 8.19 mmol, 1 equiv.), methyl 2-iodobenzoate (34.3 g, 19.2 mL, 131 mmol, 16 equiv.), copper (103 mg, 1.64 mmol, 0.2 equiv.) and anhydrous potassium carbonate (14.4 g, 12.7 mmol, 13 equiv.). The resulting reaction mixture was heated at 185 °C for 24 hours. After cooling to room temperature, the mixture was mixed with dichloromethane (50 mL) and washed with water (3 × 50 mL). The organic layer was then dried over anhydrous sodium sulfate and concentrated under reduced pressure. The resulting dark brown oil was purified by column chromatography on silica gel (CH<sub>2</sub>Cl<sub>2</sub> only). The corresponding fractions were collected and evaporated under reduced pressure to afford the desired product as a brown reddish solid (8.80 g, 55%). **R<sub>f</sub>**: 0.26 (CH<sub>2</sub>Cl<sub>2</sub>). **Mp**: 241–243 °C. **<sup>1</sup>H NMR** (400 MHz, Chloroform-*d*) δ 7.66 (dd, *J* = 7.7, 1.7 Hz, 2H), 7.47–7.43 (m, 2H), 7.42 (s, 2H), 7.25–7.21 (m, 6H), 7.17–7.13 (m, 2H), 6.80 (d, *J* = 8.7 Hz, 4H), 3.46 (s, 6H), 3.33 (s, 6H), 1.34–1.25 (m, 18H). **<sup>13</sup>C NMR** (101 MHz, Chloroform-*d*) δ 167, 166, 146, 145, 145, 141, 132, 131, 131, 130, 128, 127, 125, 123, 121, 51, 51, 34, 31. **HR-MS** [**M+H**]<sup>+</sup> Calculated: 757.3489 (C<sub>46</sub>H<sub>49</sub>N<sub>2</sub>O<sub>8</sub>); Found: 756.3411.

## Sym-DiDiKTa and Asym-DiDiKTa:

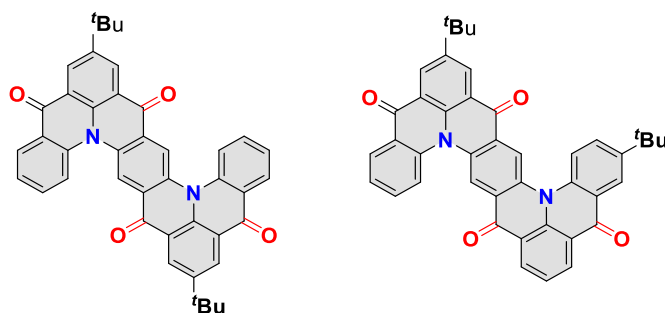

Compound **1** (4.3 g, 5.6 mmol, 1 equiv.) was combined with sodium hydroxide (2.2 g, 56 mmol, 10 equiv.) in 170 mL of an ethanol/water/tetrahydrofuran (1:1:3.5) mixture. The reaction was heated to reflux for 12 h. After cooling to room temperature, the pH was adjusted to 2-3 by addition of dilute hydrochloric acid. The tetra-acid precipitated as a brown greenish solid and was collected by vacuum filtration, washed thoroughly with water, dried under vacuum (4.9 g, 99% yield) and used without further purification and characterization. The tetra-acid (3.0 g, 4.3 mmol, 1 equiv.) was dispersed in 100 mL dichloromethane under a nitrogen atmosphere. To the reaction mixture were added sequentially thionyl chloride (20.4 g, 12.4 mL, 171 mmol, 40 equiv.) and 6 drops of *N,N*-dimethylformamide. After 3 h under reflux, the reaction mixture was cooled to room temperature. Under a positive flow of nitrogen, aluminium chloride (11.4 g, 85.6 mmol, 20 equiv.) was added slowly with stirring (exothermic reaction). After refluxing for 24 h, the reaction mixture was cooled to room temperature, and the reaction quenched by slow dropwise of water under vigorous stirring (exothermic reaction). The resulting mixture was combined with more dichloromethane (50 mL), the organic layer separated and washed with water (3 × 50 mL), and then dried over anhydrous sodium sulphate. The solvent was evaporated under reduced pressure and the brown solid crude product was purified by column chromatography on silica gel (5% EtOAc in CH<sub>2</sub>Cl<sub>2</sub>) to yield **Sym-DiDiKTa** (982 mg, 37%) and **Asym-DiDiKTa** (137 mg, 5%) both as orange solids.

**Sym-DiDiKTa:** *R<sub>f</sub>*: 0.65 (5% EtOAc in CH<sub>2</sub>Cl<sub>2</sub>). *Mp*: > 390 °C. <sup>1</sup>H NMR (400 MHz, Chloroform-*d*) δ 9.25 (s, 2H), 8.87 (d, *J* = 2.6 Hz, 2H), 8.78 (d, *J* = 2.5 Hz, 2H), 8.57 (dd, *J* = 7.9, 1.6 Hz, 2H), 8.31 (d, *J* = 8.5 Hz, 2H), 7.86–7.81 (m, 2H), 7.60–7.56 (m, 2H), 1.49 (s, 18H). <sup>13</sup>C NMR (126 MHz, Chloroform-*d*) δ 178, 178, 147, 139, 137, 135, 133, 131, 130, 128, 128, 126, 125, 123, 122, 119, 119, 35, 31. **Anal. Calcd. For C<sub>42</sub>H<sub>32</sub>N<sub>2</sub>O<sub>4</sub>:** C, 80.24%; H, 5.13%; N, 4.46%. **Anal. Found:** C, 80.45%; H, 5.02%; N, 4.30. **HR-MS (ESI<sup>+</sup>) [M+H]<sup>+</sup>** Calculated:

629.2440 ( $\text{C}_{42}\text{H}_{33}\text{N}_2\text{O}_4$ ); Found: 629.2431. 98.8% pure on HPLC analysis, retention time 2.4 minutes in 60% methanol 40% water.

**Asym-DiDiKTa:** **R<sub>f</sub>:** 0.58 (5% EtOAc in  $\text{CH}_2\text{Cl}_2$ ). **Mp:** 349 – 351 °C.  **$^1\text{H}$  NMR** (400 MHz, Chloroform-*d*)  $\delta$  9.28 (d,  $J$  = 9.6 Hz, 2H), 8.90 (d,  $J$  = 2.6 Hz, 1H), 8.86 (dd,  $J$  = 7.6, 1.6 Hz, 1H), 8.81 (d,  $J$  = 2.5 Hz, 1H), 8.76 (dd,  $J$  = 7.7, 1.8 Hz, 1H), 8.60–8.57 (m, 2H), 8.34 (d,  $J$  = 8.5 Hz, 1H), 8.27 (d,  $J$  = 8.9 Hz, 1H), 7.91 (dd,  $J$  = 8.9, 2.5 Hz, 1H), 7.88–7.84 (m, 1H), 7.69 (t,  $J$  = 7.7 Hz, 1H), 7.62–7.58 (m, 1H), 1.52–1.51 (m, 18H).  **$^{13}\text{C}$  NMR** (126 MHz, Chloroform-*d*)  $\delta$  178, 178, 178, 177, 149, 147, 139, 139, 137, 137, 135, 135, 134, 133, 133, 131, 131, 130, 128, 128, 126, 125, 125, 124, 123, 123, 123, 122, 122, 119, 119, 119, 119, 35, 35, 31, 31. **Anal. Calcd. For  $\text{C}_{42}\text{H}_{32}\text{N}_2\text{O}_4$ :** C, 80.24%; H, 5.13%; N, 4.46%. **Anal. Found:** C, 80.46%; H, 5.06%; N, 4.26; **LR-MS (MALDI<sup>+</sup>)  $[\text{M}+\text{H}]^+$**  Calculated: 629.2 ( $\text{C}_{42}\text{H}_{33}\text{N}_2\text{O}_4$ ); Found: 629.2. 99.0% pure on HPLC analysis, retention time 2.3 minutes in 60% methanol 40% water.

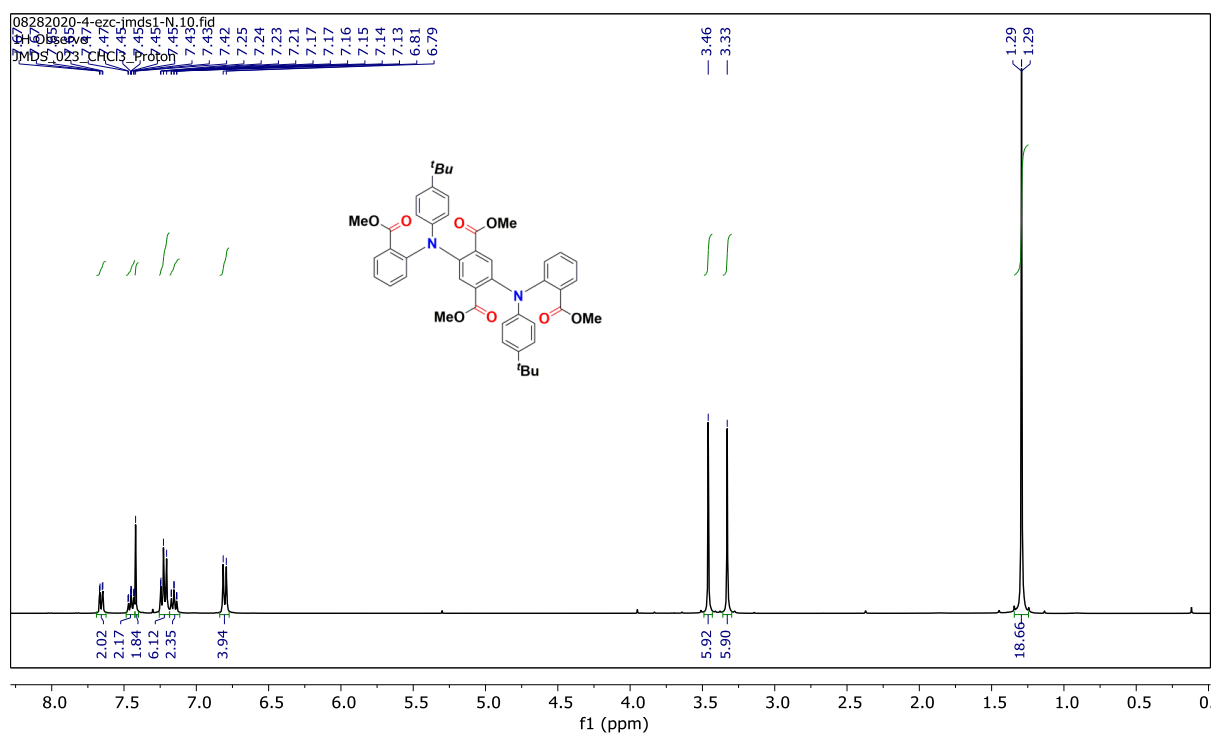

**Figure S2.**  $^1\text{H}$  NMR (400 MHz, Chloroform-*d*) of compound **1**.

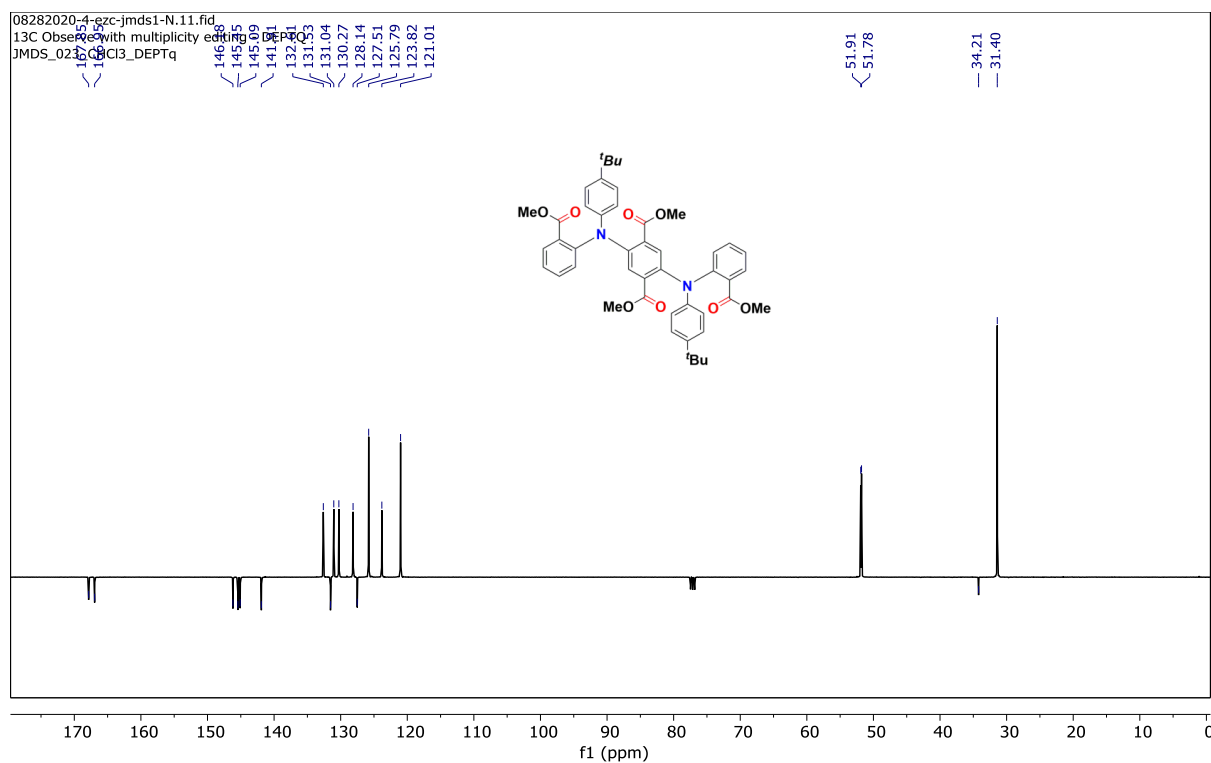

**Figure S3.** DEPTq-135 (101 MHz, Chloroform-*d*) of compound **1**.

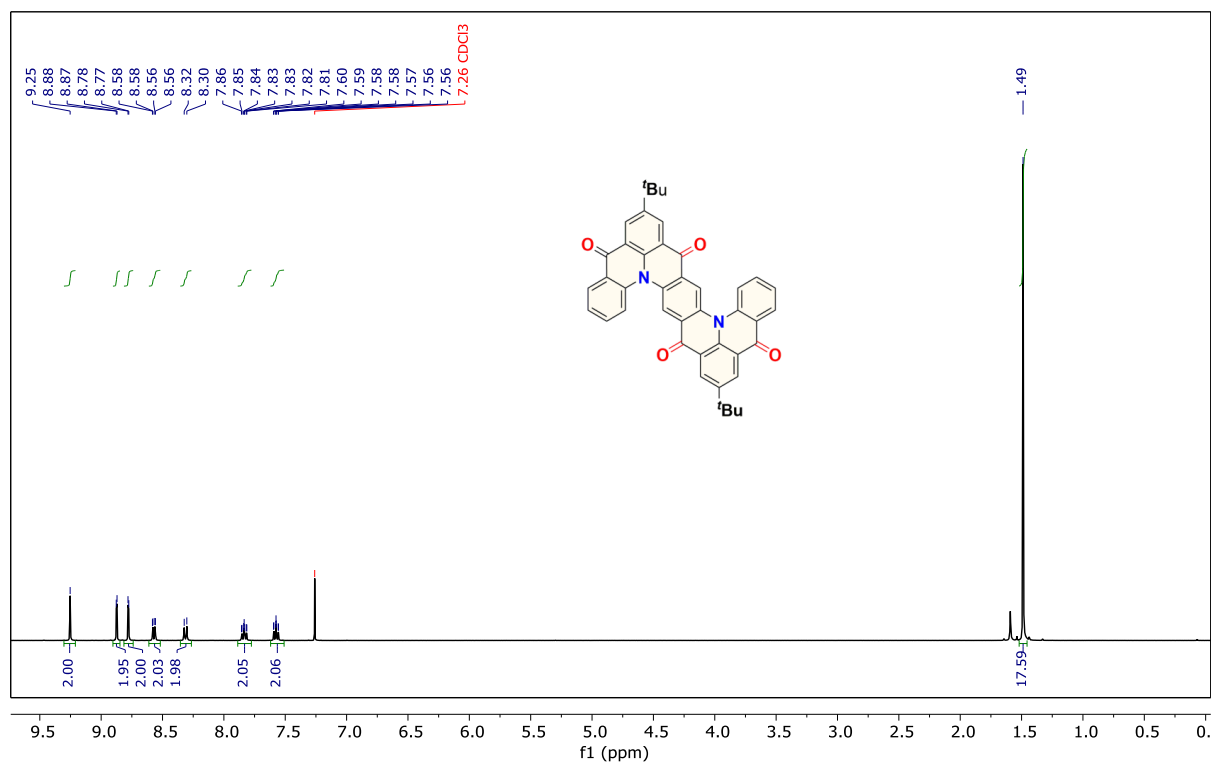

**Figure S4.** <sup>1</sup>H NMR (400 MHz, Chloroform-*d*) of Sym-DiDiKTa.

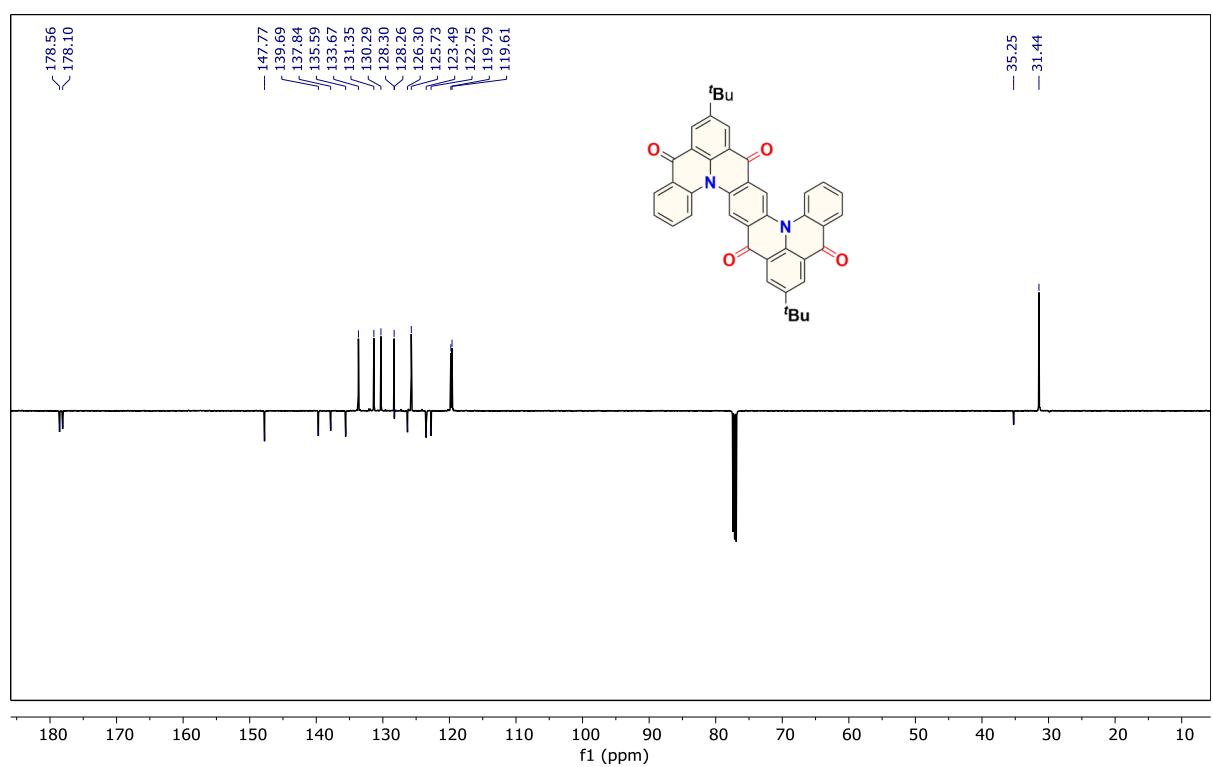

**Figure S5.** DEPTq-135 (126 MHz, Chloroform-*d*) of Sym-DiDiKTa.

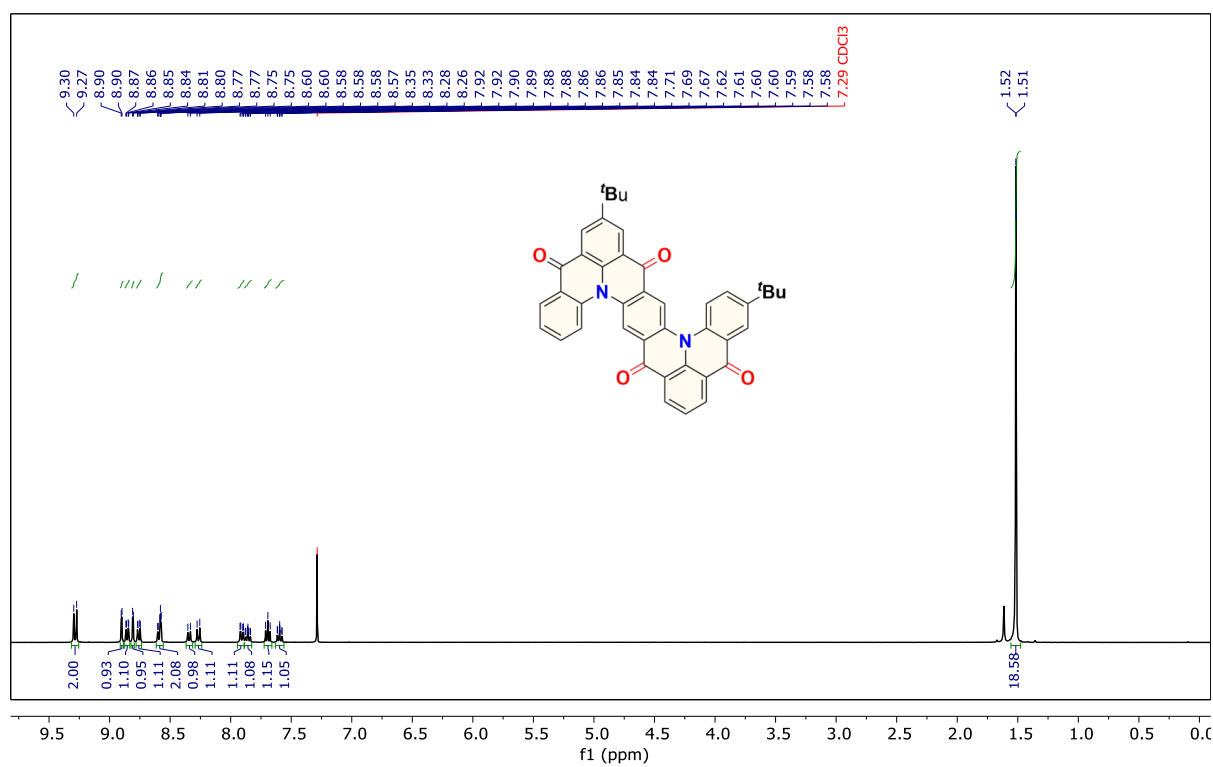

**Figure S6.** <sup>1</sup>H NMR (400 MHz, Chloroform-*d*) of Asym-DiDiKTa.

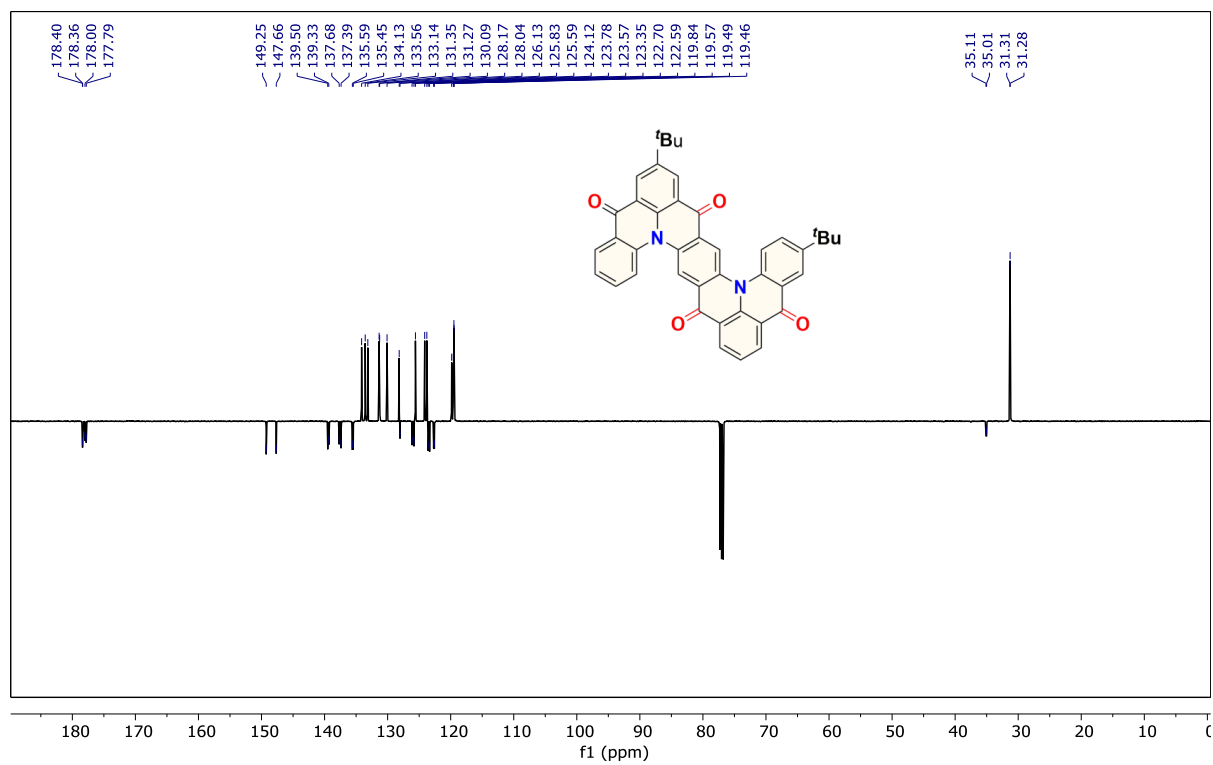

**Figure S7.** DEPTq-135 (126 MHz, Chloroform-*d*) of Asym-DiDiKTa.

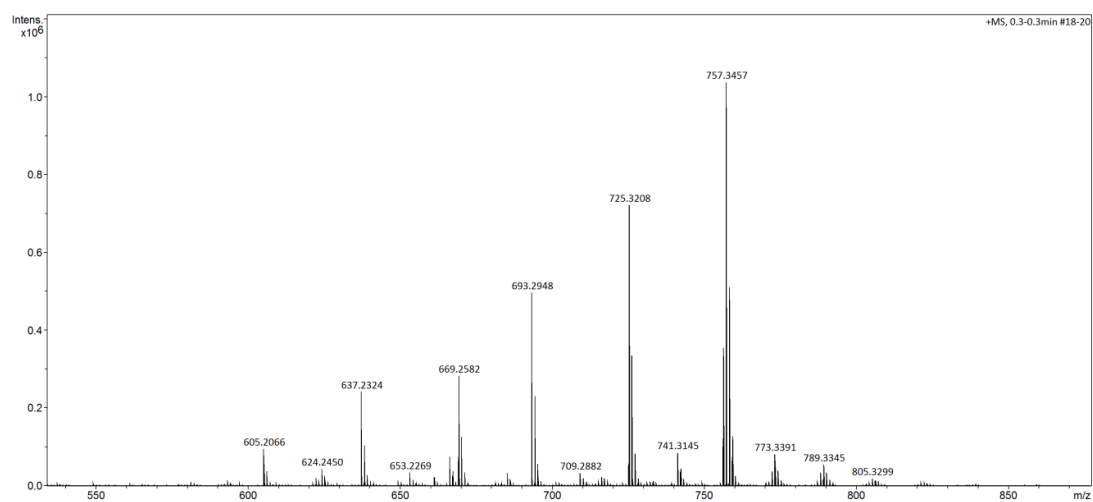

Figure S8. HRMS of compound 1.

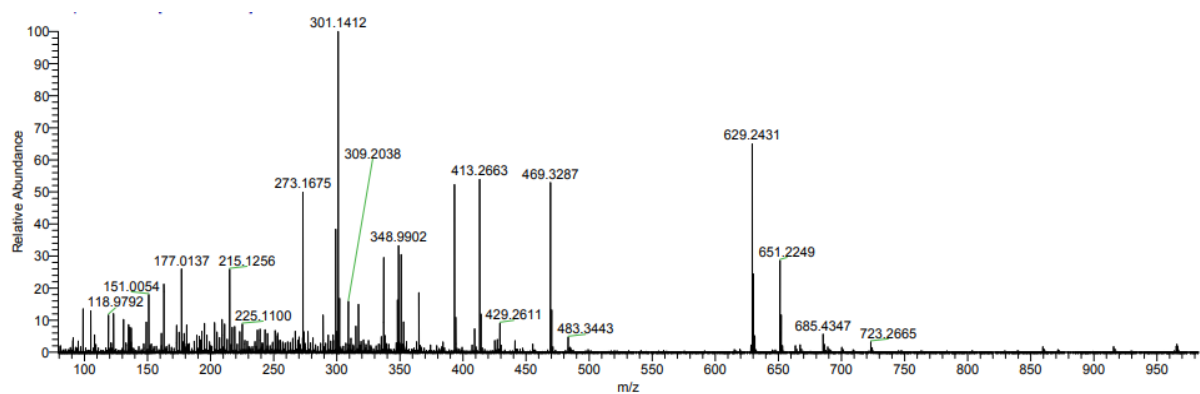

Figure S9. HRMS of Sym-DiDiKTa.

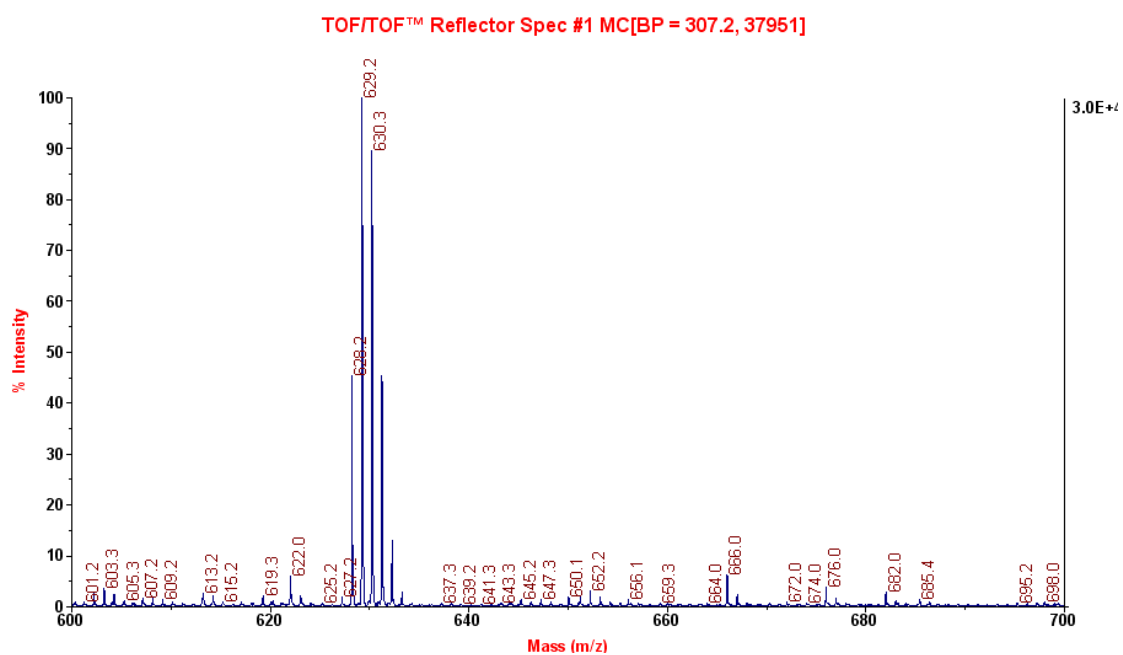

Figure S10. LRMS of Asym-DiDiKTa.

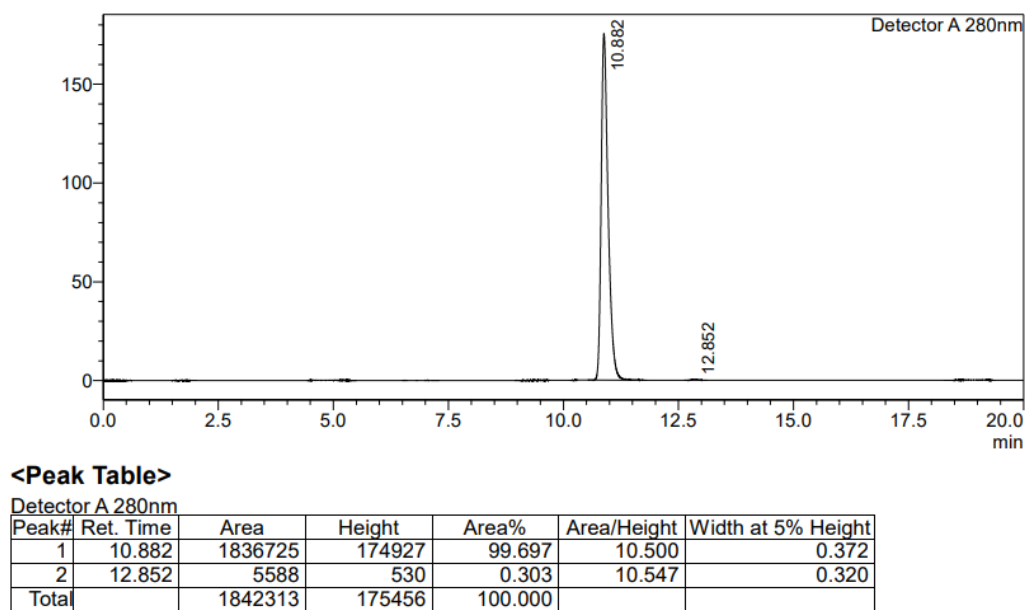

**Figure S11.** HPLC trace of Sym-DiDiKTa.

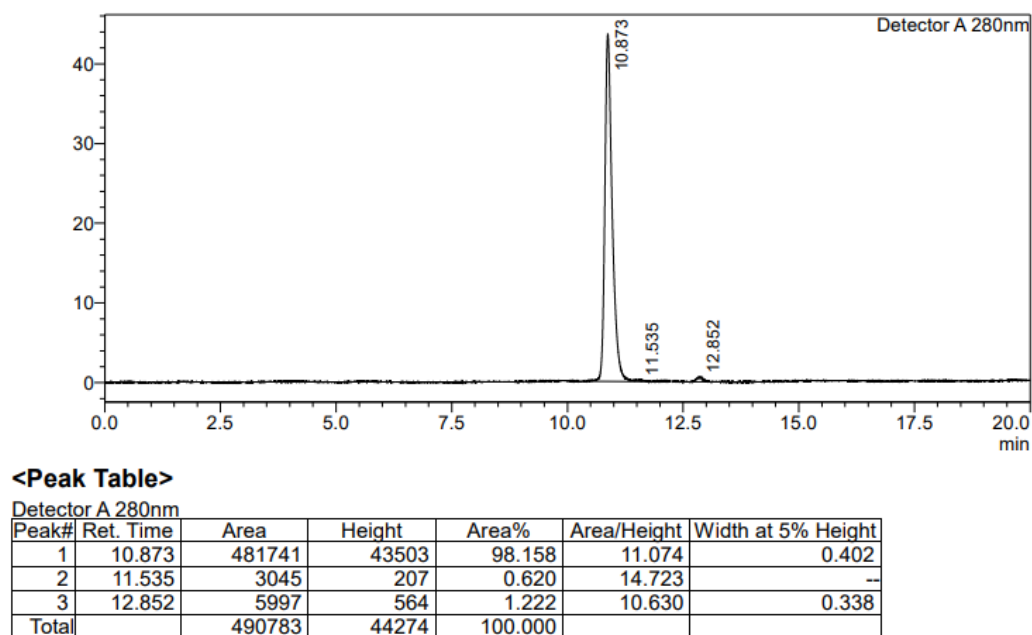

**Figure S12.** HPLC trace of Asym-DiDiKTa.

### 3. X-Ray Crystallography

X-ray diffraction data for **Sym-DiDiKTA** were collected using a Rigaku FR-X Ultrahigh Brilliance Microfocus RA generator/confocal optics with XtaLAB P200 diffractometer [Mo K $\alpha$  radiation ( $\lambda = 0.71073$  Å)]. Diffraction data for **Sym-DiDiKTA·MeOH** were collected using a Rigaku MM-007HF High Brilliance RA generator/confocal optics with XtaLAB P100 diffractometer [Cu K $\alpha$  radiation ( $\lambda = 1.54187$  Å)]. Data for **Asym-DiDiKTA** were collected using a Rigaku SCXmini CCD diffractometer with a SHINE monochromator [Mo K $\alpha$  radiation ( $\lambda = 0.71073$  Å)]. Intensity data were collected at 173 K, using either  $\omega$  steps or both  $\omega$  and  $\phi$  steps accumulating area detector images spanning at least a hemisphere of reciprocal space. Data for all compounds were collected using CrystalClear<sup>21</sup> and processed (including correction for Lorentz, polarization and absorption) using CrysAlisPro.<sup>22</sup> Structures were solved by direct (SIR2004<sup>23</sup>) or dual-space (SHELXT<sup>24</sup>) methods and refined by full-matrix least-squares against  $F^2$  (SHELXL-2018/3<sup>25</sup>). Non-hydrogen atoms were refined anisotropically, and hydrogen atoms were refined using a riding model. The structure of **Sym-DiDiKTA** showed rotational disorder in the orientation of a <sup>t</sup>Bu group. Methyl carbons were split over two sites with distance restraints applied to the minor component of the disorder. The same compound also showed non-merohedric twinning, with a twin law of [1 0 0.435 0 -1 0 0 0 -1] and a refined twin fraction of 0.33. All calculations were performed using the Olex2 interface.<sup>26</sup> Selected crystallographic data are presented in Table S2. Deposition numbers 2225501-2225503 contains the supplementary crystallographic data for this paper. These data are provided free of charge by the joint Cambridge Crystallographic Data Centre and Fachinformationszentrum Karlsruhe Access Structures service [www.ccdc.cam.ac.uk/structures](http://www.ccdc.cam.ac.uk/structures).

**Table S2.** Selected crystallographic data.

|                                                             | <b>Sym-DiDiKTA</b>                                            | <b>Sym-DiDiKTA·MeOH</b>                                       | <b>Asym-DiDiKTA</b>                                           |
|-------------------------------------------------------------|---------------------------------------------------------------|---------------------------------------------------------------|---------------------------------------------------------------|
| empirical formula                                           | C <sub>42</sub> H <sub>32</sub> N <sub>2</sub> O <sub>4</sub> | C <sub>43</sub> H <sub>36</sub> N <sub>2</sub> O <sub>5</sub> | C <sub>42</sub> H <sub>32</sub> N <sub>2</sub> O <sub>4</sub> |
| fw                                                          | 628.69                                                        | 660.74                                                        | 628.69                                                        |
| crystal description                                         | Orange prism                                                  | Orange needle                                                 | Red prism                                                     |
| crystal size [mm <sup>3</sup> ]                             | 0.11×0.07×0.03                                                | 0.21×0.02×0.01                                                | 0.18×0.09×0.08                                                |
| space group                                                 | <i>P</i> 2 <sub>1</sub> / <i>c</i>                            | <i>P</i> $\bar{1}$                                            | <i>P</i> $\bar{1}$                                            |
| <i>a</i> [Å]                                                | 10.6081(15)                                                   | 7.7000(4)                                                     | 7.4062(4)                                                     |
| <i>b</i> [Å]                                                | 15.326(2)                                                     | 13.4077(10)                                                   | 13.1648(7)                                                    |
| <i>c</i> [Å]                                                | 9.9716(13)                                                    | 15.6654(7)                                                    | 15.9136(8)                                                    |
| $\alpha$ [°]                                                |                                                               | 83.189(5)                                                     | 80.865(4)                                                     |
| $\beta$ [°]                                                 | 101.788(4)                                                    | 89.665(4)                                                     | 89.665(4)                                                     |
| $\gamma$ [°]                                                |                                                               | 81.607(5)                                                     | 81.829(4)                                                     |
| vol [Å <sup>3</sup> ]                                       | 1587.0(4)                                                     | 1588.56(16)                                                   | 1516.14(14)                                                   |
| <i>Z</i>                                                    | 2                                                             | 2                                                             | 2                                                             |
| $\rho$ (calc) [g/cm <sup>3</sup> ]                          | 1.316                                                         | 1.381                                                         | 1.377                                                         |
| $\mu$ [mm <sup>-1</sup> ]                                   | 0.085                                                         | 0.725                                                         | 0.089                                                         |
| F(000)                                                      | 660                                                           | 696                                                           | 660                                                           |
| reflections collected                                       | 17782                                                         | 16750                                                         | 15677                                                         |
| independent reflections ( <i>R</i> <sub>int</sub> )         | 2875 (0.0404)                                                 | 5677 (0.0680)                                                 | 6944 (0.0661)                                                 |
| parameters, restraints                                      | 252, 3                                                        | 462, 1                                                        | 439, 0                                                        |
| GOF on <i>F</i> <sup>2</sup>                                | 1.358                                                         | 1.041                                                         | 0.992                                                         |
| <i>R</i> <sub>1</sub> [ <i>I</i> > 2 $\sigma$ ( <i>I</i> )] | 0.0680                                                        | 0.0657                                                        | 0.0612                                                        |
| <i>wR</i> <sub>2</sub> (all data)                           | 0.2468                                                        | 0.1855                                                        | 0.1436                                                        |
| largest diff. peak/hole [e/Å <sup>3</sup> ]                 | 0.299, -0.323                                                 | 0.391, -0.276                                                 | 0.229, -0.213                                                 |

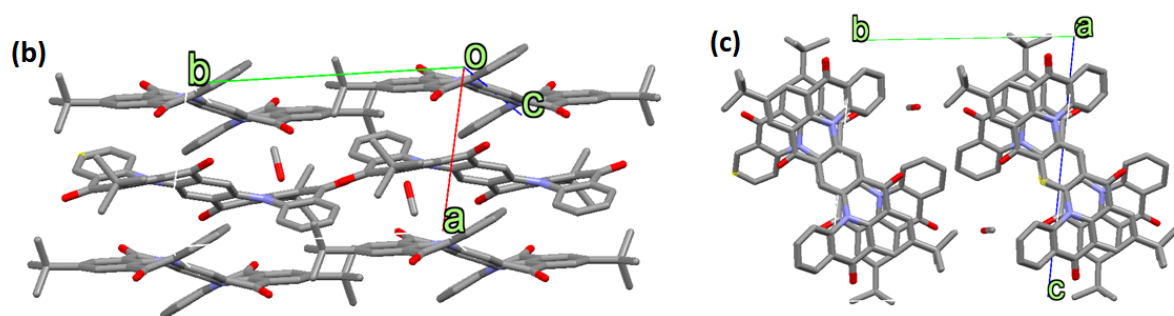

**Figure 13.** Crystal structure of **Sym-DiDiKTA** with MeOH incorporated in the unit cell: (a) diagonal view and (b) side view of the packing diagram.

#### 4. Photophysical data

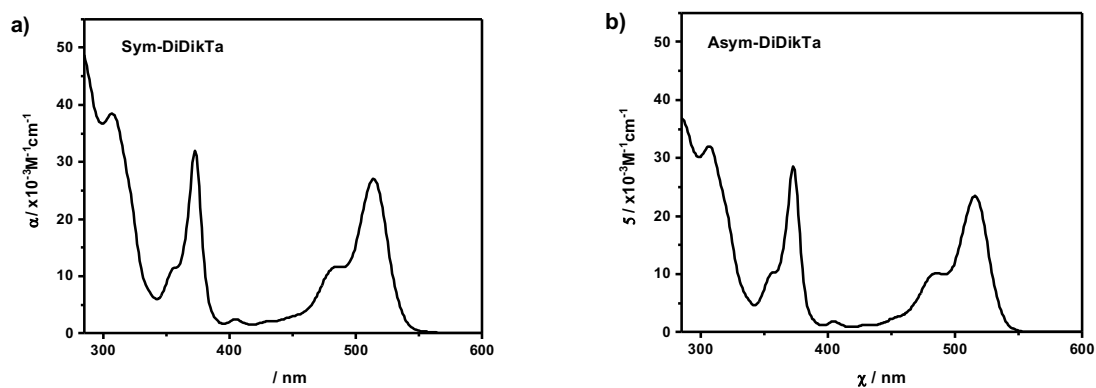

**Figure S14.** Absorption spectrum of **Sym-DiDiKTa** (a) and **Asym-DiDiKTa** (b), respectively, obtained in toluene ( $1.01 \times 10^{-5} \text{ M}$ ) at 300 K.

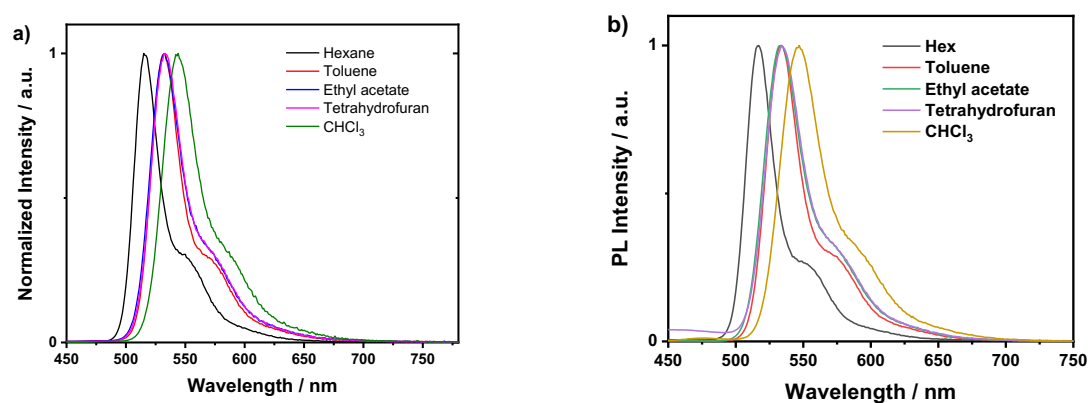

**Figure S15.** Solvatochromic PL study ( $\lambda_{\text{exc}} = 350 \text{ nm}$ ) of **Sym-DiDiKTa** (a) and **Asym-DiDiKTa** (b).

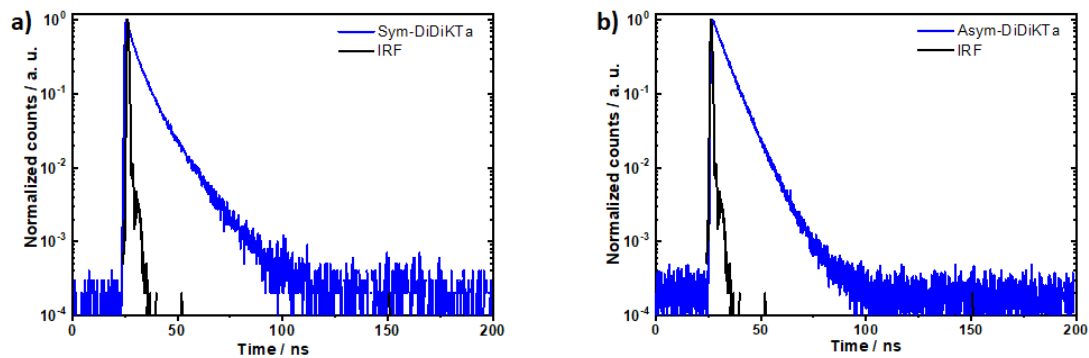

**Figure S16.** Room temperature time-resolved PL decays with a time window of 200 ns for 1 wt% **Sym-DiDiKTa** and **Asym-DiDiKTa**, respectively, in mCP matrix ( $\lambda_{\text{exc}} = 378$  nm).

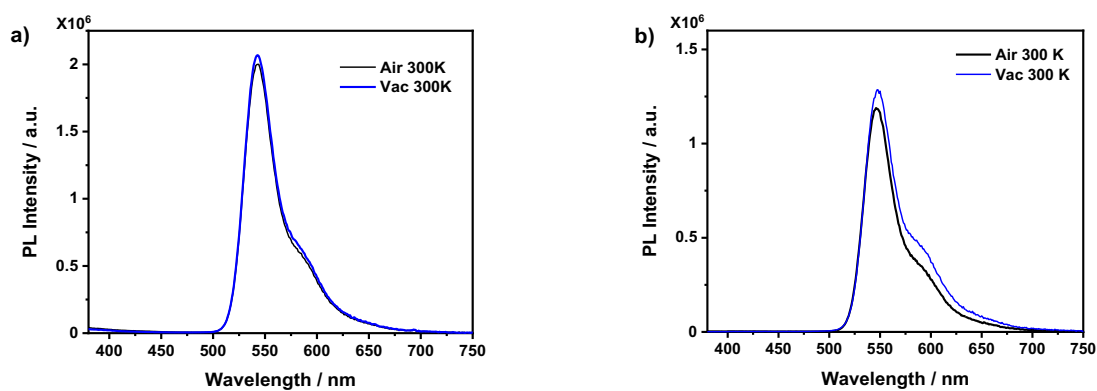

**Figure S17.** (a & b) SS PL spectra of **Sym-DiDiKTa** and **Asym-DiDiKTa**, respectively, in 1% in mCP in air and under vacuum at 300 K,  $\lambda_{\text{exc}} = 350$  nm.

**Table S3.** Summary of solvatochromic PL properties of **Sym-DiDiKTa**.

| <b>Solvent</b>     | $\lambda_{\text{PL}}^{\text{a}}$ | <b>FWHM</b> <sup>b</sup> |
|--------------------|----------------------------------|--------------------------|
|                    | <b>nm</b>                        | <b>nm / eV</b>           |
| Hexane (Hex)       | 515                              | 25 / 0.11                |
| Toluene (Tol)      | 531                              | 29 / 0.12                |
| Ethyl acetate (EA) | 532                              | 32 / 0.14                |
| THF                | 532                              | 33 / 0.14                |
| CHCl <sub>3</sub>  | 544                              | 37 / 0.15                |

<sup>a)</sup> Peak value of PL spectra obtained under aerated conditions at 300 K, concentration  $1 \times 10^{-5}$  M,  $\lambda_{\text{exc}} = 350$  nm. <sup>b)</sup> Full width at half maximum of the corresponding PL spectra.

**Table S4.** Summary of solvatochromic PL properties of **Asym-DiDiKTa**.

| <b>Solvent</b>     | $\lambda_{\text{PL}}^{\text{a}}$ | <b>FWHM</b> <sup>b</sup> |
|--------------------|----------------------------------|--------------------------|
|                    | <b>nm</b>                        | <b>nm / eV</b>           |
| Hexane (Hex)       | 516                              | 24 / 0.10                |
| Toluene (Tol)      | 533                              | 29 / 0.12                |
| Ethyl acetate (EA) | 532                              | 34 / 0.15                |
| THF                | 534                              | 35 / 0.14                |
| CHCl <sub>3</sub>  | 546                              | 38 / 0.15                |

<sup>a)</sup> Peak value of PL spectra obtained under aerated conditions at 300 K, concentration  $1 \times 10^{-5}$  M,  $\lambda_{\text{exc}} = 350$  nm. <sup>b)</sup> Full width at half maximum of the corresponding PL spectra.

**Table S5.**  $\Phi_{\text{PL}}$  study of **Sym-DiDiKTa** and **Asym-DiDiKTa** in different media,  $\lambda_{\text{exc}} = 350$  nm.

| Medium                                                   | $\Phi_{\text{PL}}(\text{N}_2^*/\text{Ar}^{**})$<br>/ % | $\Phi_{\text{PL}}(\text{air})$ / % |
|----------------------------------------------------------|--------------------------------------------------------|------------------------------------|
| <b>Sym-DiDiKTa</b> (in toluene) <sup>a</sup>             | 69.3*                                                  | 64.7                               |
| <b>Asym-DiDiKTa</b> (in toluene) <sup>a</sup>            | 52.5*                                                  | 49.7                               |
| <b>Sym-DiDiKTa</b> (0.5% in mCP) <sup>b</sup>            | 60**                                                   | -                                  |
| <b>Asym-DiDiKTa</b> (0.5% in mCP) <sup>b</sup>           | 57**                                                   | -                                  |
| <b>Sym-DiDiKTa</b> (1% in mCP) <sup>b</sup>              | 64**                                                   | -                                  |
| <b>Asym-DiDiKTa</b> (1% in mCP) <sup>b</sup>             | 57**                                                   | -                                  |
| 1% <b>Sym-DiDiKTa</b> 20% HDT1(in mCP) <sup>b</sup>      | 70**                                                   | -                                  |
| 1% <b>Sym-DiDiKTa</b> 20% HDT1(in DPEPO) <sup>b</sup>    | 75**                                                   | -                                  |
| 1% <b>Sym-DiDiKTa</b> 20% 4CzIPN (in DPEPO) <sup>b</sup> | 86**                                                   | -                                  |
| 1% <b>Sym-DiDiKTa</b> 20% 4CzIPN (in mCP) <sup>b</sup>   | 80**                                                   | -                                  |
| 1% <b>Sym-DiDiKTa</b> 20% 4CzIPN (in DPEPO) <sup>b</sup> | 88**                                                   | -                                  |

<sup>a</sup>) Film obtained *via* drop-casting. <sup>b</sup>) Film obtained *via* vacuum deposition.

**Table S6.**  $S_1$ ,  $T_1$  and  $\Delta E_{\text{ST}}$  values of **Sym-DiDiKTa** and **Asym-DiDiKTa**.<sup>a</sup>

|                     | $S_1$ / eV | $T_1$ / eV | $\Delta E_{\text{ST}}$ / eV |
|---------------------|------------|------------|-----------------------------|
| <b>Sym-DiDiKTa</b>  | 2.33       | 2.11       | 0.22                        |
| <b>Asym-DiDiKTa</b> | 2.33       | 2.12       | 0.21                        |

<sup>a</sup>  $S_1$ ,  $T_1$  and  $\Delta E_{\text{ST}}$  values of **Sym-DiDiKTa** and **Asym-DiDiKTa** calculated from the onsets of the prompt fluorescence (delay: 1 ns; gate time: 100 ns,  $\lambda_{\text{exc}} = 343$  nm) and phosphorescence (delay: 1 ms; gate time: 8.5 ms,  $\lambda_{\text{exc}} = 343$  nm) spectra in toluene glass at 77 K.

**Table S7.** Transient PL decay (MCS) data of 1 wt% **Sym-DiDiKTa** and **Asym-DiDiKTa** doped into mCP matrix at room temperature.<sup>a</sup>

| Compound            | $\tau_1$<br>/ $\mu\text{s}$ | $\tau_2$<br>/ $\mu\text{s}$ | $\tau_3$<br>/ $\mu\text{s}$ | $\tau_4$<br>/ $\mu\text{s}$ | $A_1$  | $A_2$ | $A_3$ | $A_4$ | $R_1$<br>% | $R_2$<br>% | $R_3$<br>% | $R_4$<br>% |
|---------------------|-----------------------------|-----------------------------|-----------------------------|-----------------------------|--------|-------|-------|-------|------------|------------|------------|------------|
| <b>Sym-DiDiKTa</b>  | 1.8                         | 141                         | 986                         | 5801                        | 97096  | 384   | 85    | 23    | 39.6       | 12.1       | 18.6       | 29.7       |
| <b>Asym-DiDiKTa</b> | 1.6                         | 86                          | 416                         | 2491                        | 106093 | 140   | 78    | 42    | 53.5       | 3.8        | 10.1       | 32.6       |

<sup>a</sup>) The transient PL decay data were fitted by quadruple-exponential function, where  $A_i$  is the pre-exponential for lifetime  $\tau_i$ .  $R_i$  is individual component ratio for prompt and delayed fluorescence.  $R_i = \tau_i A_i / \sum \tau_i A_i$ . The data were obtained from MCS measurements, and an accurate lifetime of the prompt emission cannot be determined from such a long time window. A separate TCSPC measurement was performed for the evaluation of the prompt emission lifetime as shown in Figure S16.

**Table S8.** Summary of rate constants of **Sym-DiDiKTa** and **Asym-DiDiKTa** doped into mCP matrix at 300 K

| Temperature         | $\tau_p^a$ | $\tau_d^b$ | $k_r^S^c$                      | $k_{ISC}^d$                    | $k_{RISC}^e$                   | $k_{nr}^S^f$                   |
|---------------------|------------|------------|--------------------------------|--------------------------------|--------------------------------|--------------------------------|
| /K                  | / ns       | / ms       | $/ \times 10^7 \text{ s}^{-1}$ | $/ \times 10^7 \text{ s}^{-1}$ | $/ \times 10^3 \text{ s}^{-1}$ | $/ \times 10^7 \text{ s}^{-1}$ |
| <b>Sym-DiDiKTa</b>  | 1.7        | 4.6        | 2.7                            | 4.1                            | 7.0                            | 3.8                            |
| <b>Asym-DiDiKTa</b> | 8.3        | 3.0        | 3.1                            | 2.7                            | 5.6                            | 4.4                            |

<sup>a)</sup> Average lifetime of prompt emission; <sup>b)</sup> Average lifetime of delayed emission; <sup>c)</sup> radiative decay rate constant of singlet excitons; <sup>d)</sup> intersystem crossing rate constant; <sup>e)</sup> reverse intersystem crossing rate constant; <sup>f)</sup> nonradiative decay rate constant of singlet excitons.

### Rate constant calculations

The constants ( $k_r$  and  $k_{nr}$ ) for prompt and delayed emission can be estimated according to their contributions to total  $\Phi_{PL}$  and their lifetimes ( $\tau_p$  and  $\tau_d$ ) according to the quadruple exponential fitting of time-resolved decay curves at 300 K. To determine the rates, we used the following equations according to previous studies<sup>27</sup> of TADF photophysical processes:

$$k_r^S = \Phi_p \times k_p \quad (1)$$

$$k_{ISC} = (\Phi_{PL} - \Phi_p) \times k_p \quad (2)$$

$$k_{RISC} = \frac{k_d \times \Phi_d}{(\Phi_{PL} - \Phi_p) \times 1} \quad (3)$$

$$k_{nr}^S = (1 - \Phi_{PL}) \times k_p \quad (4)$$

where  $\Phi_{PL}$  is the absolute  $\Phi_{PL}$ ;  $\Phi_p$  and  $\Phi_d$  are the prompt and delayed fluorescence efficiencies, respectively;  $k_p$  and  $k_d$  are the prompt and delayed fluorescence decay rate, respectively;  $\tau_p$  and  $\tau_d$  are the average lifetimes of prompt and delayed fluorescence; nr, ISC and RISC are non-radiative, intersystem crossing, and reverse intersystem crossing processes.

**Table S9.** Electrochemical data of **Sym-DiDiKTa** and **Asym-DiDiKTa** compared to the parent **DiKTa**.<sup>2</sup>

| Compound            | $E_{ox}^a$        | $E_{red}^a$        | HOMO <sup>b</sup>  | LUMO <sup>b</sup>  | $\Delta E^c$      |
|---------------------|-------------------|--------------------|--------------------|--------------------|-------------------|
|                     | / V               | / V                | / eV               | / eV               | / eV              |
| <b>Sym-DiDiKTa</b>  | 1.53              | -0.96              | -5.87              | -3.38              | 2.49              |
| <b>Asym-DiDiKTa</b> | 1.53              | -0.94              | -5.87              | -3.40              | 2.47              |
| <b>DiKTa</b>        | 1.66 <sup>2</sup> | -1.33 <sup>2</sup> | -5.93 <sup>2</sup> | -3.11 <sup>2</sup> | 2.82 <sup>2</sup> |

<sup>a)</sup> Potential values obtained for **Sym-DiDiKTa** and **Asym-DiDiKTa** from the DPV peak values, measured in degassed dichloromethane with 0.1 M [<sup>n</sup>Bu<sub>4</sub>N]PF<sub>6</sub> as the supporting electrolyte and referenced with respect to SCE (Fc/Fc<sup>+</sup> = 0.46 eV).<sup>19</sup> <sup>b)</sup> HOMO and LUMO energy levels determined using the relation  $E_{HOMO/LUMO} = -(E_{ox}/E_{red} + 4.8) \text{ eV}$  (using Fc/Fc<sup>+</sup> as the internal reference);<sup>20</sup> <sup>c)</sup>  $\Delta E = |HOMO - LUMO| \text{ eV}$ . <sup>2</sup> Value obtained from the literature in MeCN.

## 5. Quantum chemical calculations

The calculations were performed with the Gaussian 16 revision A\_03<sup>28</sup> suite for the density functional theory (DFT) and with the Turbomole/7.4<sup>29</sup> package for SCS-CC2 calculations. Ground-state optimized structures were calculated using the PBE0 functional<sup>30</sup> and the 6-31G(d,p) basis set.<sup>31</sup> Molecular orbitals were visualized using GaussView 5.0 software.<sup>32</sup> Spin-component scaling coupled-cluster singles-and-doubles model (SCS-CC2) was also used in conjunction with cc-pVDZ basis set.<sup>33</sup> We first optimized the ground state using SCS-CC2 method, then vertical excited states were performed on the ground state optimized structure using the SCS-CC2 method. Difference density plots were used to visualize change in electronic density between the ground and excited state and were visualized using the VESTA package.

**Table S11.** Computational data calculated in the gas phase for **Sym-DiDiKTa**, **Asym-DiDiKTa** and **DiKTa**.

| Compound            | HOMO / eV <sup>a</sup> | LUMO / eV <sup>a</sup> | $\Delta E$ / eV <sup>b</sup> | $S_1$ / eV ( <i>f</i> ) | $T_1$ / eV | $T_2$ / eV | $\Delta E_{ST}$ / eV |
|---------------------|------------------------|------------------------|------------------------------|-------------------------|------------|------------|----------------------|
| <b>Sym-DiDiKTa</b>  | -5.94                  | -2.69                  | 3.25                         | 2.93 (0.26)             | 2.69       | 3.15       | 0.24                 |
| <b>Asym-DiDiKTa</b> | -5.94                  | -2.69                  | 3.25                         | 2.93 (0.27)             | 2.69       | 3.16       | 0.24                 |
| <b>DiKTa</b>        | -6.20                  | -2.23                  | 3.97                         | 3.45 (0.20)             | 3.18       | 3.60       | 0.27                 |

<sup>a</sup>Calculated from PBE0/6-31G(d,p), <sup>b</sup> $\Delta E = \text{LUMO} - \text{HOMO}$ .

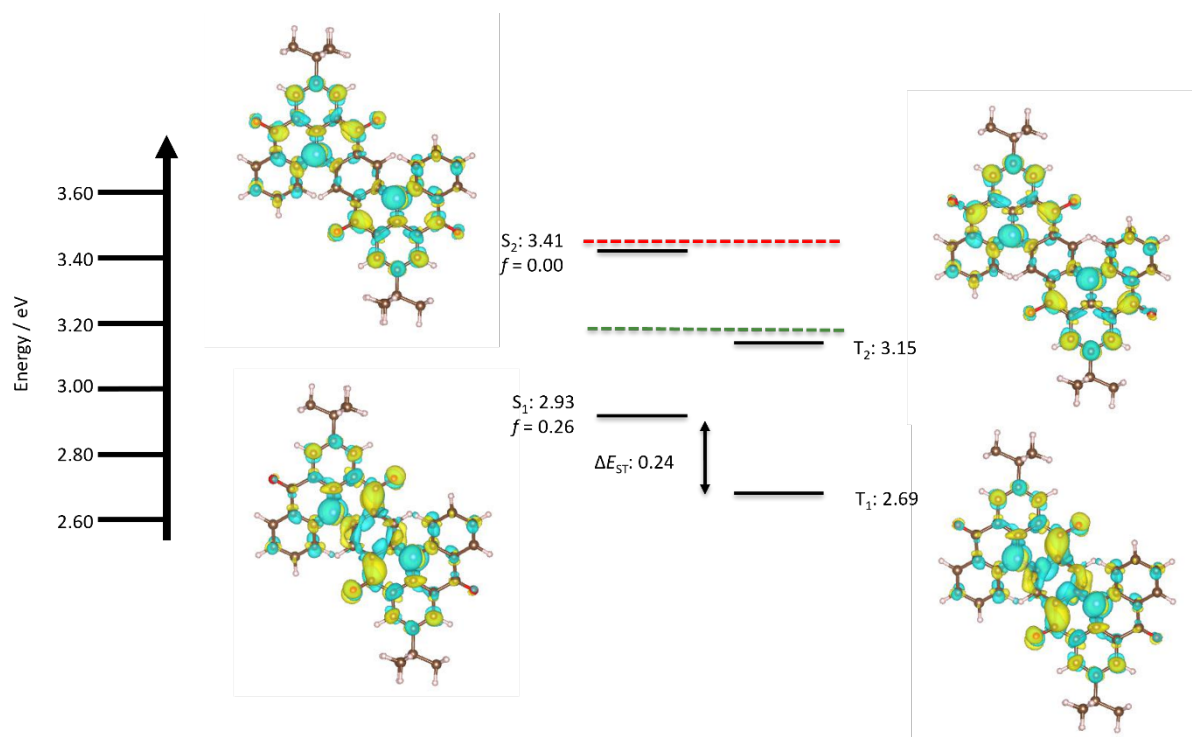

**Figure S18.** Difference density picture and excited state energies of **Sym-DiDiKTa** calculated at SCS-CC2/cc-pVDZ level, where red and green dotted lines represent calculated  $S_1$  and  $T_1$  energies respectively of **DiKTa**, (isovalue = 0.001).

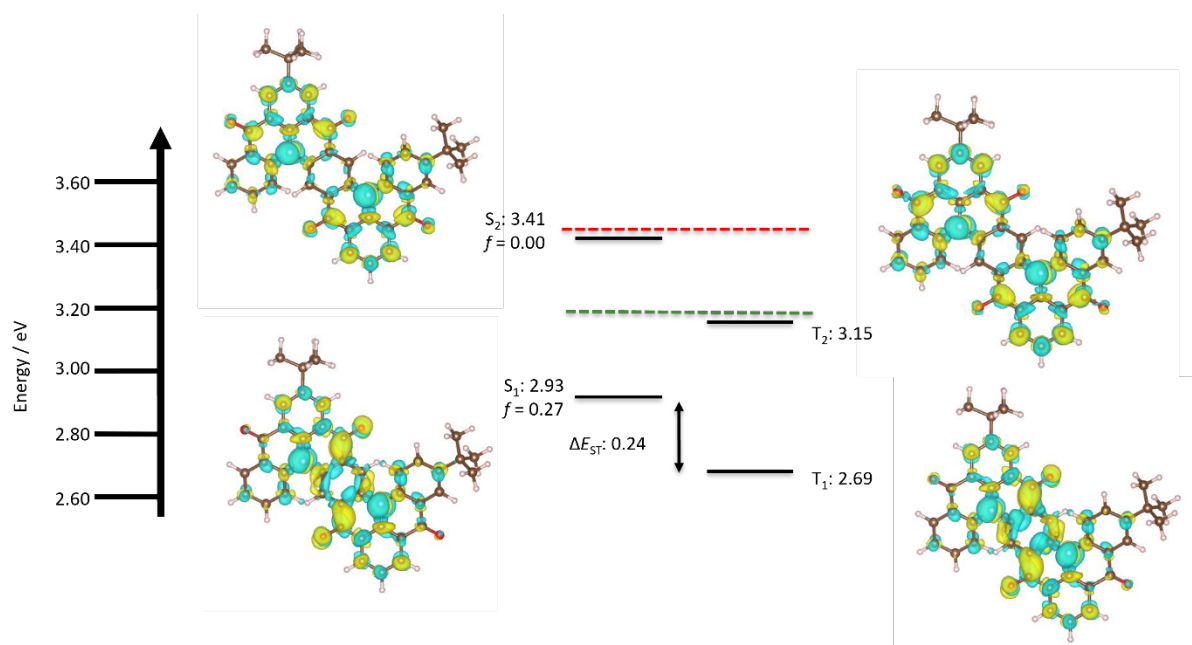

**Figure S19.** Difference density picture and excited state energies of **Asym-DiDiKTa** calculated at SCS-CC2/cc-pVDZ level, where red and green dotted lines represent calculated  $S_1$  and  $T_1$  energies respectively of **DiKTa**, (isovalue = 0.001).

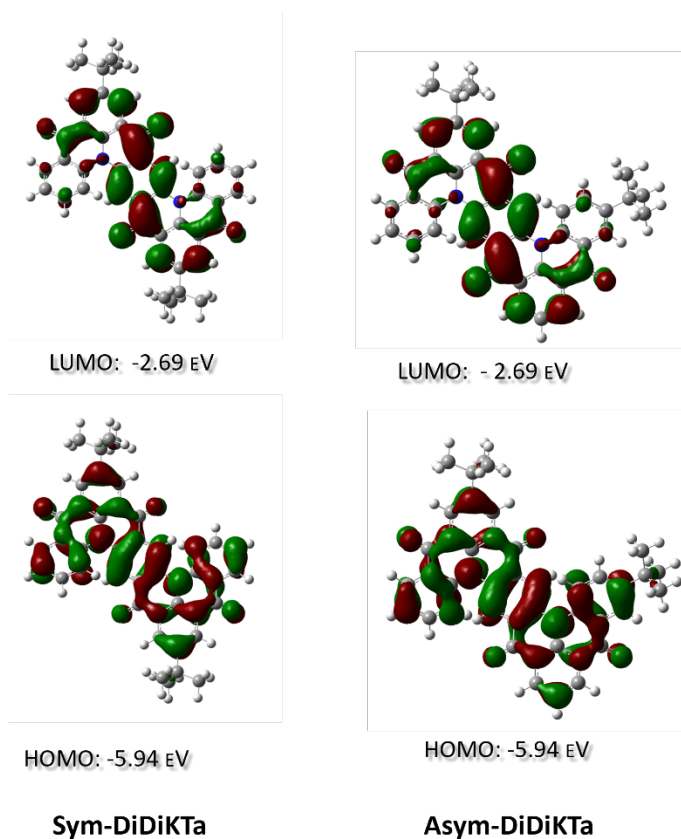

**Figure S20.** HOMO/LUMO electron density pictures and energies of **Sym-DiDiKTa** and **Asym-DiDiKTa** in the gas phase calculated with PBE0/6-31G(d,p), isovalue = 0.02.

**Table S12.** Calculated singlet excited states using SCS-CC2/cc-pVDZ, where  $f$  is oscillator strength.

| Compound            | $S_1 (f) / \text{eV}$ | $S_2 (f) / \text{eV}$ | $S_3 (f) / \text{eV}$ | $S_4 (f) / \text{eV}$ | $S_5 (f) / \text{eV}$ | $S_6 (f) / \text{eV}$ |
|---------------------|-----------------------|-----------------------|-----------------------|-----------------------|-----------------------|-----------------------|
| <b>Sym-DiDiKTa</b>  | 2.93 (0.26)           | 3.41 (0.00)           | 3.76 (0.00)           | 3.84 (0.25)           | 3.88 (0.06)           | 4.17 (0.20)           |
| <b>Asym-DiDiKTa</b> | 2.93 (0.27)           | 3.41 (0.00)           | 3.73 (0.00)           | 3.76 (0.00)           | 3.83 (0.25)           | 3.87 (0.00)           |

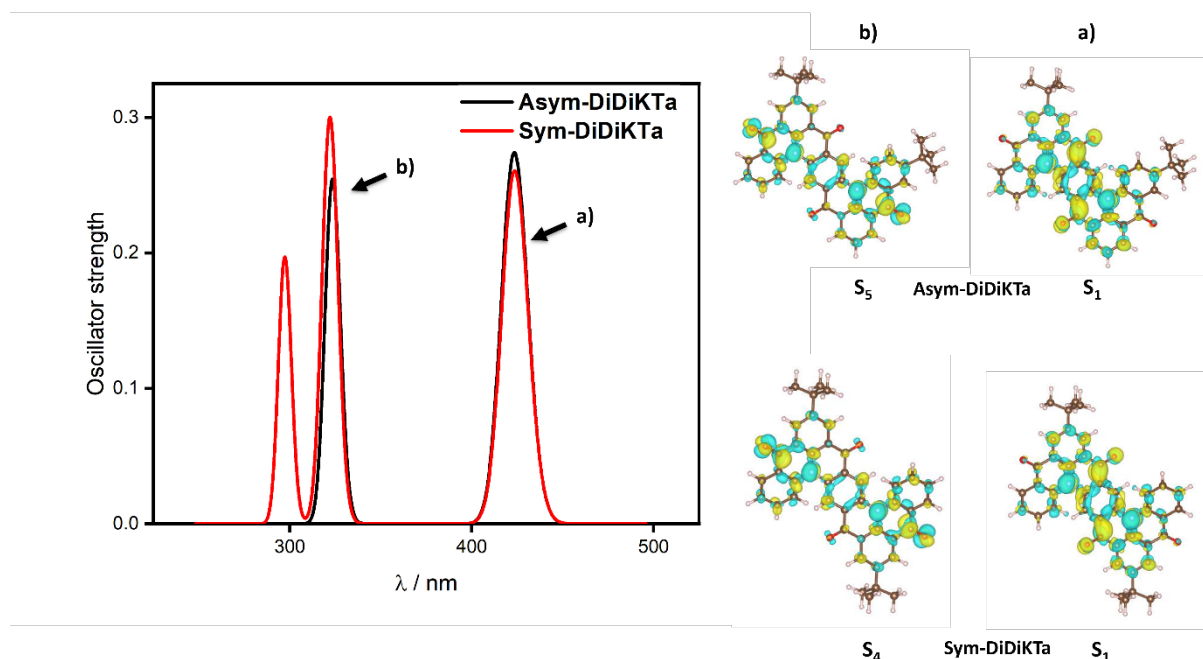

**Figure S21.** Simulated absorption spectra of **Asym-DiDiKTa** and **SymDiDiKTa** calculated from the first six singlet excited states from SCS-CC2 (FWHM = 0.05 eV), and difference density plots of the key transitions, (isovalue = 0.001).

## 6. OLED characterization

The OLEDs were fabricated through vacuum deposition of the materials at ca.  $10^{-5}$  Pa onto indium tin oxide-coated glass substrates having a sheet resistance of ca.  $15 \Omega$  per  $\square$ . The indium tin oxide surface was cleaned ultrasonically and sequentially with acetone, *isopropanol* and deionized water, then dried in an oven, and finally exposed to ultraviolet light and ozone for about 10 min. Organic layers were deposited at a rate of 1–2 Å/s. Subsequently, Liq was deposited at 0.1–0.2 Å/s. The devices were exposed once to nitrogen gas after the formation of the organic layers to allow the fixing of a metal mask to define the cathode area. For all OLEDs, the emitting areas were determined by the overlap of two electrodes as  $0.04 \text{ cm}^2$ . The J-V-luminance characteristics were evaluated using a Keithley 2400 source meter and an absolute external quantum efficiency (EQE) measurement system (C9920-12, Hamamatsu Photonics, Japan).

## 7. LEC fabrication and characterization

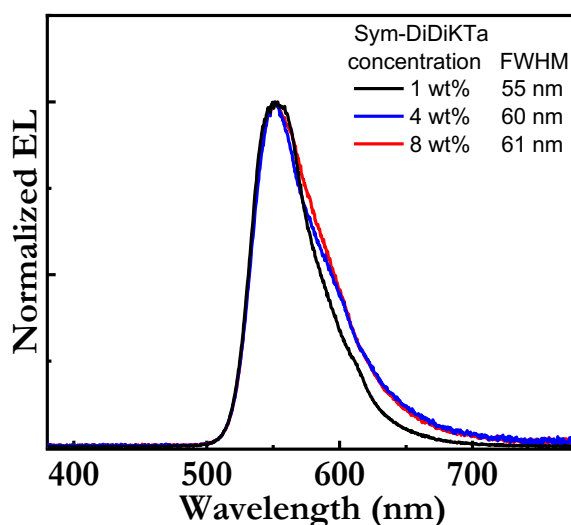

**Figure S22.** The steady-state EL spectrum of the blend-host:guest LEC for three different guest concentrations, as identified in the inset. The inset also presents the corresponding values for the FWHM.

The active-material ink was prepared by dissolving the constituents in chlorobenzene in a total concentration of 40 g/L by stirring on a magnetic hot at 90 °C plate for 3 h. The LEC devices were fabricated by sequentially spin-coating indium tin oxide-coated glass substrates with first a poly(3,4-ethylenedioxythiophene) polystyrene sulfonate ink (Clevios P VP AI4083, Heraeus) at 4000 rpm for 60 s and then the active-material ink at 2000 rpm for 60 s. A set of four Al cathodes was deposited on top of the active material by thermal evaporation under vacuum ( $p < 5 \times 10^{-4}$  Pa). The light-emission area was  $0.85 \times 0.15$  cm<sup>2</sup>, as defined by the overlap between the anode and the cathode. All of the above procedures, except for the deposition of the PEDOT:PSS layer, were carried out in two interconnected N<sub>2</sub>-filled glove boxes ([O<sub>2</sub>] < 1 ppm, [H<sub>2</sub>O] < 0.5 ppm). The LEC devices were characterized with a computer-controlled source-measure unit (Agilent U2722A) and a calibrated photodiode, equipped with an eye-response filter (S9219-01, Hamamatsu Photonics), connected to an embedded evaluation board (myRIO-1900, National Instruments) *via* a current-to-voltage amplifier. The EL spectra were recorded with a calibrated fiber-optic spectrometer (USB2000+, Ocean Optics).

## References

1. Yuan, Y.; Tang, X.; Du, X. Y.; Hu, Y.; Yu, Y. J.; Jiang, Z. Q.; Liao, L. S.; Lee, S. T., The Design of Fused Amine/Carbonyl System for Efficient Thermally Activated Delayed Fluorescence: Novel Multiple Resonance Core and Electron Acceptor. *Advanced Optical Materials* **2019**, 7 (7), 6-11.
2. Hall, D.; Suresh, S. M.; dos Santos, P. L.; Duda, E.; Bagnich, S.; Pershin, A.; Rajamalli, P.; Cordes, D. B.; Slawin, A. M. Z.; Beljonne, D.; Köhler, A.; Samuel, I. D. W.; Olivier, Y.; Zysman-Colman, E., Improving Processability and Efficiency of Resonant TADF Emitters: A Design Strategy. *Advanced Optical Materials* **2020**, 8 (2), 1901627-1901627.
3. Li, X.; Shi, Y. Z.; Wang, K.; Zhang, M.; Zheng, C. J.; Sun, D. M.; Dai, G. L.; Fan, X. C.; Wang, D. Q.; Liu, W.; Li, Y. Q.; Yu, J.; Ou, X. M.; Adachi, C.; Zhang, X. H., Thermally Activated Delayed Fluorescence Carbonyl Derivatives for Organic Light-Emitting Diodes with Extremely Narrow Full Width at Half-Maximum. *ACS Applied Materials and Interfaces* **2019**, 11 (14), 13472-13480.
4. Sun, D.; Suresh, M.; Hall, D.; Zhang, M.; Si, C.; Cordes, D. B.; Slawin, A. M. Z.; Olivier, Y.; Zhang, X.; Zysman-colman, E., The design of an extended multiple resonance TADF emitter based on a polycyclic amine/carbonyl system. *Materials Chemistry Frontiers* **2020**, 4, 2018-2022.
5. Qiu, X.; Tian, G.; Lin, C.; Pan, Y.; Ye, X.; Wang, B.; Ma, D.; Hu, D.; Luo, Y.; Ma, Y., Narrowband Emission from Organic Fluorescent Emitters with Dominant Low-Frequency Vibronic Coupling. *Advanced Optical Materials* **2020**, 9 (4), 2001845-2001845.
6. Huang, F.; Wang, K.; Shi, Y. Z.; Fan, X. C.; Zhang, X.; Yu, J.; Lee, C. S.; Zhang, X. H., Approaching Efficient and Narrow RGB Electroluminescence from D-A-Type TADF Emitters Containing an Identical Multiple Resonance Backbone as the Acceptor. *ACS Applied Materials and Interfaces* **2021**, 13 (30), 36089-36097.
7. Zou, S.-n.; Peng, C.-c.; Yang, S.-y.; Qu, Y.-k.; Yu, Y.-j.; Chen, X.; Jiang, Z.-q.; Liao, L.-s., Fully Bridged Triphenylamine Derivatives as Color-Tunable Thermally Activated Delayed Fluorescence Emitters. *Organic Letters* **2021**, 23 (3), 958-962.
8. Hamzehpoor, E.; Perepichka, D. F., Crystal Engineering of Room Temperature Phosphorescence in Organic Solids. *Angewandte Chemie - International Edition* **2020**, 59 (25), 9977-9981.
9. Tsuchiya, Y.; Ishikawa, Y.; Lee, S. H.; Chen, X. K.; Brédas, J. L.; Nakanotani, H.; Adachi, C., Thermally Activated Delayed Fluorescence Properties of Trioxoazatriangulene Derivatives Modified with Electron Donating Groups. *Advanced Optical Materials* **2021**, 9 (14), 2002174-2002174.
10. Wang, K.; Fan, X.-C.; Tsuchiya, Y.; Shi, Y.-Z.; Tanaka, M.; Lin, Z.; Lee, Y.-t.; Zhang, X.; Liu, W.; Dai, G.-l.; Chen, J.-X.; Wu, B.; Zhong, J.; Jian, Y.; Zheng, C.-J.; Yu, J.; Lee, C.-S.; Adachi, C.; Zhang, X.-H., Efficient and high colour purity RGB OLEDs employing densely packed dimers. *ChemRxiv. Cambridge: Cambridge Open Engage* **2021**.
11. Min, H.; Park, I. S.; Yasuda, T., cis - Quinacridone - Based Delayed Fluorescence Emitters: Seemingly Old but Renewed Functional Luminogens. *Angewandte Chemie International Edition* **2021**, 60 (14), 7643-7648.
12. dos Santos, J. M.; Sun, D.; Moreno-Naranjo, J. M.; Hall, D.; Zinna, F.; Ryan, S. T. J.; Shi, W.; Matulaitis, T.; Cordes, D. B.; Slawin, A. M. Z.; Beljonne, D.; Warriner, S. L.; Olivier, Y.; Fuchter, M. J.; Zysman-Colman, E., An S-shaped double helicene showing both multi-resonance thermally activated delayed fluorescence and circularly polarized luminescence. *Journal of Materials Chemistry C* **2022**, 10, 4861-4870.
13. Yang, S.-Y.; Zou, S.-N.; Kong, F.-C.; Liao, X.-J.; Qu, Y.-K.; Feng, Z.-Q.; Zheng, Y.-X.; Jiang, Z.-Q.; Liao, L.-S., A narrowband blue circularly polarized thermally activated delayed fluorescence emitter with a hetero-helicene structure. *Chemical Communications* **2021**, 57 (84), 11041-11044.
14. Yang, S.-Y.; Tian, Q.-S.; Liao, X.-J.; Wu, Z.-G.; Shen, W.-S.; Yu, Y.-J.; Feng, Z.-Q.; Zheng, Y.-X.; Jiang, Z.-Q.; Liao, L.-S., Efficient circularly polarized thermally activated delayed fluorescence hetero-

- [4]helicene with carbonyl-/sulfone-bridged triarylamine structures. *Journal of Materials Chemistry C* **2022**, *10* (11), 4393-4401.
15. Wu, S.; Li, W.; Yoshida, K.; Hall, D.; Madayanad Suresh, S.; Sayner, T.; Gong, J.; Beljonne, D.; Olivier, Y.; Samuel, I. D. W.; Zysman-Colman, E., Excited-State Modulation in Donor-Substituted Multiresonant Thermally Activated Delayed Fluorescence Emitters. *ACS Applied Materials & Interfaces* **2022**, *14* (19), 22341-22352.
  16. Wu, S.; Gupta, A. K.; Yoshida, K.; Gong, J.; Hall, D.; Cordes, D. B.; Slawin, A. M. Z.; Samuel, I. D. W.; Zysman-Colman, E., Highly Efficient Green & Red Narrowband Emissive Organic Light-Emitting Diodes Employing Multi-Resonant Thermally Activated Delayed Fluorescence Emitters. *Angewandte Chemie - International Edition* **2022**, *61* (52), e202213697.
  17. Luo, X. F.; Li, F. L.; Zou, J. W.; Zou, Q.; Su, J.; Mao, M. X.; Zheng, Y. X., A Series of Fused Carbazole/Carbonyl Based Blue to Yellow-Green Thermally Activated Delayed Fluorescence Materials for Efficient Organic Light-Emitting Diodes. *Advanced Optical Materials* **2021**, *9* (21).
  18. Liu, J.-F.; Zou, S.-N.; Chen, X.; Yang, S.-Y.; Yu, Y.-J.; Fung, M.-K.; Jiang, Z.-Q.; Liao, L.-S., Isomeric thermally activated delayed fluorescence emitters based on a quinolino[3,2,1-de]acridine-5,9-dione multiple resonance core and carbazole substituent. *Materials Chemistry Frontiers* **2022**, *6* (7), 966-972.
  19. Connelly, N. G.; Geiger, W. E., Chemical redox agents for organometallic chemistry. *Chemical Reviews* **1996**, *96* (2), 877-910.
  20. Cardona, C. M.; Li, W.; Kaifer, A. E.; Stockdale, D.; Bazan, G. C., Electrochemical considerations for determining absolute frontier orbital energy levels of conjugated polymers for solar cell applications. *Advanced Materials* **2011**, *23* (20), 2367-2371.
  21. *CrystalClear-SM Expert v2.1.*, Rigaku Americas, The Woodlands, Texas, USA, and Rigaku Corporation: Tokyo, Japan, 2015.
  22. *CrysAlisPro v1.171.40.14a and v1.171.41.93a.*, Rigaku Oxford Diffraction, Rigaku Corporation: Oxford, U.K., 2018-2020.
  23. Burla, M. C.; Caliandro, R.; Camalli, M.; Carrozzini, B.; Cascarano, G. L.; De Caro, L.; Giacovazzo, C.; Polidori, G.; Spagna, R., An Improved Tool for Crystal Structure Determination and Refinement. *Journal of Applied Crystallography* **2005**, *38*, 381-388.
  24. Sheldrick, G. M., SHELXT— Integrated space-group and crystal structure determination *Acta Crystallographica* **2015**, *71*, 3-8.
  25. Sheldrick, G. M., Crystal structure refinement with SHELXL. *Acta Crystallographica. Sect. C* **2015**, *71*, 3-8.
  26. Dolomanov, O. V.; Bourhis, L. J.; Gildea, R. J.; Howard, J. A. K.; Puschmann, H., OLEX2: A Complete Structure Solution, Refinement and Analysis Program. *Journal of Applied Crystallography* **2009**, *42*, 339-341.
  27. Tsuchiya, Y.; Diesing, S.; Bencheikh, F.; Wada, Y.; dos Santos, P. L.; Kaji, H.; Zysman-Colman, E.; Samuel, I. D. W.; Adachi, C., Exact Solution of Kinetic Analysis for Thermally Activated Delayed Fluorescence Materials. *Journal of Physical Chemistry A* **2021**, *125* (36), 8074-8089.
  28. Frisch, M. J.; Trucks, G. W.; Schlegel, H. B.; Scuseria, G. E.; Robb, M. A.; Cheeseman, J. R.; Scalmani, G.; Barone, V.; Petersson, G. A.; Nakatsuji, H.; Li, X.; Caricato, M.; Marenich, A. V.; Bloino, J.; Janesko, B. G.; Gomperts, R.; Mennucci, B.; Hratchian, H. P.; Ortiz, J. V.; Izmaylov, A. F.; Sonnenberg, J. L.; Williams-Young, D.; Ding, F.; Lipparini, F.; Egidi, F.; Goings, J.; Peng, B.; Petrone, A.; Henderson, T.; Ranasinghe, D.; Zakrzewski, V. G.; Gao, J.; Rega, N.; Zheng, G.; Liang, W.; Hada, M.; Ehara, M.; Toyota, K.; Fukuda, R.; Hasegawa, J.; Ishida, M.; Nakajima, T.; Honda, Y.; Kitao, O.; Nakai, H.; Vreven, T.; Throssell, K.; Montgomery, J. A.; Jr; Peralta, J. E.; Ogliaro, F.; Bearpark, M. J.; Heyd, J. J.; Brothers, E. N.; Kudin, K. N.; Staroverov, V. N.; Keith, T. A.; Kobayashi, R.; Normand, J.; Raghavachari, K.; Rendell, A. P.; Burant, J. C.; Iyengar, S. S.; Tomasi, J.; Cossi, M.; Millam, J. M.; Klene, M.; Adamo, C.; Cammi, R.; Ochterski, J. W.; Martin, R. L.; Morokuma, K.; Farkas, O.; Foresman, J. B.; Fox, D. J., Gaussian 16, Revision C.01. Gaussian, Inc.: Wallingford CT, 2016.
  29. Balasubramani, S. G.; Chen, G. P.; Coriani, S.; Diedenhofen, M.; Frank, M. S.; Franzke, Y. J.; Furche, F.; Grotjahn, R.; Harding, M. E.; Hättig, C.; Hellweg, A.; Helmich-Paris, B.; Holzer, C.; Huniar, U.;

- Kaupp, M.; Marefat, A. K.; Khani, S. K.; Müller, T.; Mack, F.; Nguyen, B. D.; Parker, S. M.; Perlt, E.; Rappoport, D.; Reiter, K.; Roy, S. M. R.; Schmitz, G.; Sierka, M.; Tapavicza, E.; Tew, D. P.; Artur; Wullen, C. v.; Voora, V. K.; Weigend, F.; Wodzynski, A.; Yu, J. M., TURBOMOLE: Modular program suite for ab initio quantum-chemical and condensed-matter simulations. *The Journal of Chemical Physics* **2020**, *152*, 184107-184107.
30. Adamo, C.; Barone, V., Toward reliable density functional methods without adjustable parameters: The PBE0 model. *The Journal of Chemical Physics* **1999**, *110* (13), 6158-6170.
31. Dunning, T. H., Gaussian basis sets for use in correlated molecular calculations. I. The atoms boron through neon and hydrogen. *Journal of Chemical Physics* **1989**, *90* (2), 1007-1023.
32. Dennington, R.; Keith, T.; Millam, J., Gauss View, version 5. Semichem Inc.: Shawnee Mission, 2009.
33. Petersson, G. A.; Al-Laham, M. A., A complete basis set model chemistry. II. Open-shell systems and the total energies of the first-row atoms. *Journal of Chemical Physics* **1991**, *94* (9), 6081-6090.
